# Supplementary material for: Association of Healthy Lifestyle Factors and Obesity-Related Diseases in Adults in the UK
Source: PubMed Central journal article supplement (PMC10220514; doi:10.1001/jamanetworkopen.2023.14741), 2023-05-26

## Supplemental Online Content

Rassy N, Van Straaten A, Carette C, Hamer M, Rives-Lange C, Czernichow S. Association of healthy lifestyle factors and obesity-related diseases in adults in the UK. *JAMA Netw Open*. 2023;6(5):e2314741. doi:10.1001/jamanetworkopen.2023.14741

**eTable 1.** Codes Used to Define the Variables Included in the Study

**eTable 2.** Definition and Scoring of Lifestyle Factors

**eTable 3.** *International Classification of Diseases, Tenth Revision (ICD-10)* Codes for Diseases Included in the Study

**eTable 4.** Hazard Ratios for Incident Diseases by Lifestyle Profile in Each Body Mass Index Category

**eTable 5.** Hazard Ratios for All-Cause Mortality by Lifestyle Profile in Each Body Mass Index Category

**eTable 6.** Adjusted Hazard Ratios for All-Cause Mortality by Lifestyle Profile in Each Body Mass Index Category

**eTable 7.** Associations of Overweight With Incident Diseases by Healthy Lifestyle Score

**eTable 8.** Associations of Body Mass Index With All-Cause Mortality by Healthy Lifestyle Score

**eFigure 1.** Flowchart of Sample Selection

**eFigure 2.** Hazard Ratios for Incident Diseases by Body Mass Index Category

**eFigure 3.** Adjusted Hazard Ratios for Incident Diseases by Body Mass Index Category

**eFigure 4.** A. Hazard Ratios for Incident Diseases by Lifestyle Profile in Individuals With Normal Weight (BMI 1.5-24.9), B. Overweight (BMI 25-29.9), and C. Obesity (BMI  $\geq 30$ )

**eFigure 5.** Adjusted Hazard Ratios for Incident Diseases by Lifestyle Profile in Individuals With Overweight (BMI 25-29.9)

**eFigure 6.** Hazard Ratios for All-Cause Mortality by Lifestyle Profile in Individuals With Normal Weight (BMI 18.5-24.9 kg/m<sup>2</sup>), Overweight (BMI 25-29.9), and Obesity (BMI  $\geq 30$ ) Before (A) and After Adjustment (B) for Age, Sex, and Townsend Deprivation Index

**eTable 9.** Associations of Body Mass Index With Incident Diseases by Healthy Lifestyle Score After Exclusion of Participants With Diseases Diagnosed Within the First 2 Years of Follow-up

**eTable 10.** Hazard Ratios for Incident Diseases by Lifestyle Profile in Each Body Mass Index Category After Exclusion of Participants With Diseases Diagnosed With the First 2 Years of Follow-up

**eTable 11.** Adjusted Hazard Ratios for Incident Diseases by Lifestyle Profile in Each Body Mass Index Category After Exclusion of Participants With Diseases Diagnosed With the First 2 Years of Follow-up

**eFigure 7.** Hazard Ratios for Incident Diseases by Body Mass Index Category After Exclusion of Participants With Diseases Diagnosed Within the First 2 Years of Follow-up

**eFigure 8.** Adjusted Hazard Ratios for Incident Diseases by Body Mass Index Category After Exclusion of Participants With Diseases Diagnosed Within the First 2 Years of Follow-up

**eFigure 9.** Hazard Ratios for Incident Diseases by Lifestyle Profile in Individuals With Normal Weight (BMI 18.5-24.9) (A), Overweight (BMI 25-29.9) (B), and Obesity (BMI  $\geq 30$ ) (C) After Exclusion of Participants With Diseases Diagnosed Within the First 2 Years of Follow-up

**eFigure 10.** Adjusted Hazard Ratios for Incident Diseases by Lifestyle Profile in Individuals With Normal Weight (BMI 18.5-24.9) (A), Overweight (BMI 25-29.9) (B), and Obesity (BMI  $\geq 30$ ) (C) After Exclusion of Participants With Diseases Diagnosed Within the First 2 Years of Follow-up

**eFigure 11.** Association of Healthy Lifestyle Score With Incident Diseases in Adults With a Healthy Weight

**eFigure 12.** Association of Healthy Lifestyle Score With Incident Diseases in Adults With Obesity

This supplemental material has been provided by the authors to give readers additional information about their work.

**eTable 1. Codes Used to Define the Variables Included in the Study**

| <b>Variable</b>                                                                                                                      | <b>Field IDs</b>                   |
|--------------------------------------------------------------------------------------------------------------------------------------|------------------------------------|
| Age at recruitment                                                                                                                   | 21022                              |
| Sex                                                                                                                                  | 31                                 |
| Townsend deprivation index                                                                                                           | 189                                |
| Body mass index                                                                                                                      | 21001                              |
| Diagnoses – main and secondary ICD10                                                                                                 | 41270                              |
| Date of first in-patient diagnosis in either the primary or secondary position in the participant's hospital inpatient records ICD10 | 41280                              |
| Smoking status                                                                                                                       | 20116                              |
| Alcohol intake (champagne, white wine, beer, cider, spirits, fortified wine, and other types of alcohol consumption)                 | 1568, 1578, 1588, 1598, 1608, 5364 |
| Cooked and raw vegetables intake                                                                                                     | 1289, 1299                         |
| Fresh and dried fruit intake                                                                                                         | 1309, 1319                         |
| Bread intake and type                                                                                                                | 1448, 1438                         |
| Cereal intake and type                                                                                                               | 1458, 1468                         |
| Oily and non-oily fish                                                                                                               | 1329, 1339                         |
| Cheese and milk intake                                                                                                               | 1408, 1418                         |
| Vegetable oils intake                                                                                                                | 1428, 2654                         |
| Poultry, beef, lamb, pork, processed meat intake                                                                                     | 1359, 1369, 1379, 1389, 1349       |
| Sugar-sweetened beverages intake                                                                                                     | 6144                               |
| Days/week of vigorous physical activity 10+ minutes                                                                                  | 904                                |
| Duration of vigorous activity                                                                                                        | 914                                |
| Days/week of moderate physical activity 10+ minutes                                                                                  | 884                                |
| Duration of moderate activity                                                                                                        | 894                                |
| Number of days/week walked 10+ minutes                                                                                               | 864                                |
| Duration of walks                                                                                                                    | 874                                |
| ICD: International Classification of Disease version 10                                                                              |                                    |

**eTable 2. Definition and Scoring of Lifestyle Factors**

| <b>Lifestyle factor</b>                                                                                                                                                                                                                                                                                                                                                                                                                                               | <b>Score</b> |
|-----------------------------------------------------------------------------------------------------------------------------------------------------------------------------------------------------------------------------------------------------------------------------------------------------------------------------------------------------------------------------------------------------------------------------------------------------------------------|--------------|
| <b>Physical activity<sup>a</sup></b>                                                                                                                                                                                                                                                                                                                                                                                                                                  |              |
| ≥2.5 hours of moderate activity/week or ≥1.25 hours of vigorous activity/week                                                                                                                                                                                                                                                                                                                                                                                         | 1            |
| <2.5 hours of moderate activity/week or <1.25 hours of vigorous activity/week                                                                                                                                                                                                                                                                                                                                                                                         | 0            |
| <b>Alcohol consumption</b>                                                                                                                                                                                                                                                                                                                                                                                                                                            |              |
| 0-5 drink/week in women and 0-10 drink/week in men                                                                                                                                                                                                                                                                                                                                                                                                                    | 1            |
| > 5 drink/week in women and > 10 drink/week in men                                                                                                                                                                                                                                                                                                                                                                                                                    | 0            |
| <b>Smoking</b>                                                                                                                                                                                                                                                                                                                                                                                                                                                        |              |
| Never smoker                                                                                                                                                                                                                                                                                                                                                                                                                                                          | 1            |
| Current or former smoker                                                                                                                                                                                                                                                                                                                                                                                                                                              | 0            |
| <b>Healthy diet<sup>b</sup></b>                                                                                                                                                                                                                                                                                                                                                                                                                                       |              |
| Adequate intake of ≥ 5 diet components                                                                                                                                                                                                                                                                                                                                                                                                                                | 1            |
| Adequate intake of < 5 diet components                                                                                                                                                                                                                                                                                                                                                                                                                                | 0            |
| <sup>a</sup> walking was considered moderate activity                                                                                                                                                                                                                                                                                                                                                                                                                 |              |
| <sup>b</sup> Components of dietary recommendations for cardiovascular health:<br>fruits: ≥ 3 servings/day; vegetables: ≥ 3 servings/day; whole grains: ≥ 3 servings/day; refined grains: ≤ 2 servings/day;<br>fish and shellfish: ≥ 2 servings/week; dairy: ≥ 2 servings/day; vegetable oils: ≥ 2 servings/day; processed meats: ≤ 1<br>serving/week; unprocessed meats: ≤ 2 servings/week; Sugar sweetened beverages (including 100% fruit juice): no<br>consumption |              |

**eTable 3. International Classification of Diseases, Tenth Revision (ICD-10) Codes for Diseases Included in the Study**

| <b>Disease</b>            | <b>ICD-10 code</b> |
|---------------------------|--------------------|
| Bacterial infections      | A01-A79            |
| Viral infections          | A80-B34            |
| Diabetes                  | E10-E14            |
| Esophageal adenocarcinoma | C15                |
| Gastric cardia cancer     | C160               |
| Pancreatic cancer         | C25                |
| Liver cancer              | C22                |
| Colorectal cancer         | C18-C19-C20        |
| Breast cancer             | C50                |
| Ovarian cancer            | C56                |
| Endometrial cancer        | C54                |
| Kidney cancer             | C64                |
| Hypertension              | I10-I15            |
| Ischemic heart disease    | I20-I25            |
| Pulmonary embolism        | I26                |
| Arrhythmias               | I46-I49            |
| Heart failure             | I50                |
| Cerebrovascular diseases  | I60-I69            |
| Arteriosclerosis          | I70                |
| Deep vein thrombosis      | I80-I82            |
| Asthma                    | J45–J46            |
| Liver disease             | K70–K77            |
| Renal failure             | N17-N19            |
| Gout                      | M10                |
| Osteoarthritis            | M15–M19            |
| Sleep disorders           | G47                |
| Mood disorders            | F30-F39            |

**eTable 4. Hazard Ratios for Incident Diseases by Lifestyle Profile in Each Body Mass Index Category**

| Healthy lifestyle factor |                                    |               |              | HR (95% CI)                    |                             |                           |                        |
|--------------------------|------------------------------------|---------------|--------------|--------------------------------|-----------------------------|---------------------------|------------------------|
| Physically active        | No or moderate alcohol consumption | Never smoking | Healthy diet | Total population (n = 438 583) | BMI 18.5-24.9 (n = 144 579) | BMI 25-29.9 (n = 186 963) | BMI ≥ 30 (n = 107 041) |
| No                       | No                                 | No            | No           | <i>Reference</i>               | <i>Reference</i>            | <i>Reference</i>          | <i>Reference</i>       |
| No                       | No                                 | No            | Yes          | 0.71 (0.68-0.74)               | 0.6 (0.55-0.67)             | 0.71 (0.66-0.76)          | 0.82 (0.77-0.88)       |
| No                       | No                                 | Yes           | No           | 0.92 (0.89-0.96)               | 0.89 (0.82-0.97)            | 0.92 (0.87-0.97)          | 1.03 (0.97-1.09)       |
| No                       | No                                 | Yes           | Yes          | 0.69 (0.67-0.72)               | 0.65 (0.60-0.71)            | 0.72 (0.68-0.77)          | 0.80 (0.75-0.86)       |
| No                       | Yes                                | No            | No           | 1.17 (1.13-1.22)               | 1.06 (0.98-1.16)            | 1.13 (1.07-1.19)          | 1.22 (1.16-1.29)       |
| No                       | Yes                                | No            | Yes          | 0.77 (0.75-0.8)                | 0.63 (0.58-0.68)            | 0.76 (0.72-0.81)          | 0.9 (0.85-0.95)        |
| No                       | Yes                                | Yes           | No           | 1.12 (1.08-1.16)               | 0.97 (0.9-1.05)             | 1.08 (1.02-1.14)          | 1.23 (1.17-1.30)       |
| No                       | Yes                                | Yes           | Yes          | 0.83 (0.80-0.86)               | 0.70 (0.65-0.75)            | 0.84 (0.80-0.88)          | 0.98 (0.93-1.03)       |
| Yes                      | No                                 | No            | No           | 0.86 (0.83-0.88)               | 0.84 (0.78-0.91)            | 0.89 (0.85-0.94)          | 0.92 (0.87-0.98)       |
| Yes                      | No                                 | No            | Yes          | 0.60 (0.58-0.63)               | 0.55 (0.51-0.60)            | 0.64 (0.61-0.68)          | 0.74 (0.69-0.79)       |
| Yes                      | No                                 | Yes           | No           | 0.77 (0.74-0.79)               | 0.71 (0.66-0.76)            | 0.86 (0.82-0.9)           | 0.92 (0.87-0.97)       |
| Yes                      | No                                 | Yes           | Yes          | 0.60 (0.58-0.62)               | 0.59 (0.55-0.63)            | 0.68 (0.64-0.71)          | 0.74 (0.69-0.79)       |
| Yes                      | Yes                                | No            | No           | 0.98 (0.95-1.01)               | 0.90 (0.83-0.97)            | 1.02 (0.97-1.07)          | 1.05 (0.99-1.10)       |
| Yes                      | Yes                                | No            | Yes          | 0.66 (0.64-0.69)               | 0.60 (0.56-0.65)            | 0.69 (0.66-0.73)          | 0.80 (0.76-0.85)       |
| Yes                      | Yes                                | Yes           | No           | 0.90 (0.88-0.93)               | 0.82 (0.76-0.88)            | 0.95 (0.90-0.99)          | 1.06 (1.01-1.11)       |
| Yes                      | Yes                                | Yes           | Yes          | 0.68 (0.66-0.71)               | 0.64 (0.60-0.68)            | 0.75 (0.72-0.78)          | 0.86 (0.8-0.90)        |

HR, hazard ratio; CI, confidence interval

**eTable 5. Hazard Ratios for All-Cause Mortality by Lifestyle Profile in Each Body Mass Index Category**

| Healthy lifestyle factor |                                    |               |              | HR (95% CI)                    |                             |                           |                        |
|--------------------------|------------------------------------|---------------|--------------|--------------------------------|-----------------------------|---------------------------|------------------------|
| Physically active        | No or moderate alcohol consumption | Never smoking | Healthy diet | Total population (n = 438 583) | BMI 18.5-24.9 (n = 144 579) | BMI 25-29.9 (n = 186 963) | BMI ≥ 30 (n = 107 041) |
| No                       | No                                 | No            | No           | <i>Reference</i>               | <i>Reference</i>            | <i>Reference</i>          | <i>Reference</i>       |
| No                       | No                                 | No            | Yes          | 0.38 (0.33-0.45)               | 0.26 (0.19-0.37)            | 0.40 (0.31-0.51)          | 0.49 (0.37-0.64)       |
| No                       | No                                 | Yes           | No           | 0.72 (0.64-0.80)               | 0.58 (0.47-0.73)            | 0.73 (0.61-0.87)          | 0.84 (0.69-1.03)       |
| No                       | No                                 | Yes           | Yes          | 0.39 (0.33-0.45)               | 0.32 (0.25-0.42)            | 0.37 (0.30-0.47)          | 0.48 (0.37-0.63)       |
| No                       | Yes                                | No            | No           | 1.19 (1.07-1.31)               | 1.15 (0.94-1.41)            | 1.20 (1.02-1.41)          | 1.19 (1.10-1.41)       |
| No                       | Yes                                | No            | Yes          | 0.45 (0.40-0.50)               | 0.32 (0.25-0.40)            | 0.47 (0.39-0.57)          | 0.54 (0.44-0.65)       |
| No                       | Yes                                | Yes           | No           | 1.02 (0.93-1.13)               | 0.93 (0.77-1.14)            | 0.95 (0.80-1.12)          | 1.16(0.98-1.37)        |
| No                       | Yes                                | Yes           | Yes          | 0.47 (0.42-0.52)               | 0.37 (0.30-0.46)            | 0.48 (0.41-0.57)          | 0.54 (0.45-0.65)       |
| Yes                      | No                                 | No            | No           | 0.78 (0.71-0.86)               | 0.70 (0.58-0.85)            | 0.82 (0.70-0.95)          | 0.82 (0.68-0.99)       |
| Yes                      | No                                 | No            | Yes          | 0.38 (0.33-0.43)               | 0.32 (0.25-0.4)             | 0.38 (0.31-0.46)          | 0.46 (0.36-0.59)       |
| Yes                      | No                                 | Yes           | No           | 0.55 (0.50-0.60)               | 0.39 (0.32-0.47)            | 0.61 (0.53-0.71)          | 0.71 (0.59-0.84)       |
| Yes                      | No                                 | Yes           | Yes          | 0.32 (0.28-0.35)               | 0.23 (0.19-0.28)            | 0.34 (0.29-0.40)          | 0.46 (0.38-0.57)       |
| Yes                      | Yes                                | No            | No           | 0.89 (0.81-0.99)               | 0.75 (0.62-0.92)            | 0.89 (0.76-1.04)          | 1.03 (0.87-1.22)       |
| Yes                      | Yes                                | No            | Yes          | 0.39 (0.35-0.44)               | 0.35 (0.28-0.42)            | 0.4 (0.34-0.48)           | 0.42 (0.35-0.52)       |
| Yes                      | Yes                                | Yes           | No           | 0.67 (0.61-0.74)               | 0.53 (0.44-0.63)            | 0.71(0.62-0.82)           | 0.78 (0.66-0.92)       |
| Yes                      | Yes                                | Yes           | Yes          | 0.37 (0.34-0.41)               | 0.28 (0.24-0.34)            | 0.40 (0.35-0.47)          | 0.47 (0.40-0.56)       |

HR, hazard ratio; CI, confidence interval

**eTable 6. Adjusted Hazard Ratios for All-Cause Mortality by Lifestyle Profile in Each Body Mass Index Category**

| Healthy lifestyle factor |                                    |               |              | HR (95% CI) <sup>a</sup>       |                             |                           |                        |
|--------------------------|------------------------------------|---------------|--------------|--------------------------------|-----------------------------|---------------------------|------------------------|
| Physically active        | No or moderate alcohol consumption | Never smoking | Healthy diet | Total population (n = 438 583) | BMI 18.5-24.9 (n = 144 579) | BMI 25-29.9 (n = 186 963) | BMI ≥ 30 (n = 107 041) |
| No                       | No                                 | No            | No           | <i>Reference</i>               | <i>Reference</i>            | <i>Reference</i>          | <i>Reference</i>       |
| No                       | No                                 | No            | Yes          | 0.52 (0.44-0.61)               | 0.37 (0.26-0.53)            | 0.52 (0.41-0.67)          | 0.64 (0.49-0.83)       |
| No                       | No                                 | Yes           | No           | 0.77 (0.68-0.86)               | 0.64 (0.51-0.80)            | 0.75 (0.63-0.90)          | 0.88 (0.72-1.07)       |
| No                       | No                                 | Yes           | Yes          | 0.51 (0.44-0.59)               | 0.43 (0.33-0.56)            | 0.47 (0.37-0.59)          | 0.65 (0.50-0.84)       |
| No                       | Yes                                | No            | No           | 1.11 (1.01-1.23)               | 1.08 (0.89-1.33)            | 1.13 (0.96-1.32)          | 1.16 (0.98-1.38)       |
| No                       | Yes                                | No            | Yes          | 0.56 (0.50-0.63)               | 0.40 (0.31-0.51)            | 0.58 (0.48-0.70)          | 0.69 (0.56-0.84)       |
| No                       | Yes                                | Yes           | No           | 0.97 (0.88-1.08)               | 0.95 (0.78-1.15)            | 0.89 (0.76-1.05)          | 1.11 (0.94-1.32)       |
| No                       | Yes                                | Yes           | Yes          | 0.56 (0.50-0.63)               | 0.45 (0.36-0.55)            | 0.56 (0.47-0.66)          | 0.68 (0.56-0.82)       |
| Yes                      | No                                 | No            | No           | 0.76 (0.69-0.84)               | 0.68 (0.56-0.82)            | 0.77 (0.66-0.89)          | 0.79 (0.66-0.95)       |
| Yes                      | No                                 | No            | Yes          | 0.48 (0.43-0.55)               | 0.41 (0.32-0.52)            | 0.46 (0.38-0.56)          | 0.58 (0.46-0.74)       |
| Yes                      | No                                 | Yes           | No           | 0.58 (0.53-0.64)               | 0.42 (0.35-0.50)            | 0.60 (0.52-0.69)          | 0.71 (0.60-0.85)       |
| Yes                      | No                                 | Yes           | Yes          | 0.40 (0.36-0.45)               | 0.29 (0.23-0.35)            | 0.39 (0.33-0.47)          | 0.60 (0.48-0.74)       |
| Yes                      | Yes                                | No            | No           | 0.82 (0.74-0.90)               | 0.68 (0.56-0.82)            | 0.79 (0.68-0.93)          | 0.97 (0.82-1.15)       |
| Yes                      | Yes                                | No            | Yes          | 0.47 (0.42-0.53)               | 0.40 (0.33-0.49)            | 0.46 (0.39-0.55)          | 0.54 (0.44-0.66)       |
| Yes                      | Yes                                | Yes           | No           | 0.65 (0.59-0.71)               | 0.51 (0.43-0.61)            | 0.65 (0.56-0.76)          | 0.76 (0.64-0.89)       |
| Yes                      | Yes                                | Yes           | Yes          | 0.44 (0.40-0.48)               | 0.32 (0.27-0.38)            | 0.44 (0.38-0.51)          | 0.58 (0.49-0.69)       |

HR, hazard ratio; CI, confidence interval, BMI, Body mass index  
<sup>a</sup>HR adjusted for age, sex, and Townsend deprivation index



**eTable 7. Associations of Overweight With Incident Diseases by Healthy Lifestyle Score**

| Diseases                         | Healthy lifestyle score<br>Adjusted HR (95% CI) <sup>a</sup> |                  |                  |                  |                  |
|----------------------------------|--------------------------------------------------------------|------------------|------------------|------------------|------------------|
|                                  | 4                                                            | 3                | 2                | 1                | 0                |
| <b>Infections</b>                |                                                              |                  |                  |                  |                  |
| BMI 18.5-24.9 kg/m <sup>2</sup>  | 1 (Reference)                                                | 1.13 (1.04-1.23) | 1.28 (1.18-1.4)  | 1.56 (1.42-1.72) | 1.86 (1.57-2.19) |
| BMI 25-29.9 kg/m <sup>2</sup>    | 1.19 (1.08-1.30)                                             | 1.24 (1.14-1.34) | 1.35 (1.24-1.46) | 1.40 (1.28-1.53) | 1.61 (1.40-1.84) |
| <b>Diabetes</b>                  |                                                              |                  |                  |                  |                  |
| BMI 18.5-24.9 kg/m <sup>2</sup>  | 1 (Reference)                                                | 1.17 (1.03-1.33) | 1.15 (1.01-1.31) | 1.19 (1.02-1.4)  | 1.51 (1.16-1.96) |
| BMI 25-29.9 kg/m <sup>2</sup>    | 2.29 (2.02-2.59)                                             | 2.48 (2.21-2.77) | 2.53 (2.26-2.84) | 2.80 (2.48-3.15) | 3.00 (2.56-3.52) |
| <b>Esophageal adenocarcinoma</b> |                                                              |                  |                  |                  |                  |
| BMI 18.5-24.9 kg/m <sup>2</sup>  | 1 (Reference)                                                | 1.27 (0.73-2.21) | 2.15 (1.27-3.64) | 2.61 (1.47-4.63) | 4.49 (2.12-9.53) |
| BMI 25-29.9 kg/m <sup>2</sup>    | 1.01 (0.54-1.87)                                             | 1.58 (0.94-2.63) | 2.21 (1.34-3.63) | 3.17 (1.9-5.27)  | 3.49 (1.84-6.62) |
| <b>Gastric cardia cancer</b>     |                                                              |                  |                  |                  |                  |
| BMI 18.5-24.9 kg/m <sup>2</sup>  | 1 (Reference)                                                | 1.51 (0.64-3.6)  | 1.64 (0.69-3.94) | 2.21 (0.85-5.7)  | 5.16 (1.64-16.3) |
| BMI 25-29.9 kg/m <sup>2</sup>    | 0.98 (0.37-2.64)                                             | 1.73 (0.77-3.89) | 2.26 (1.02-4.99) | 2.66 (1.17-6.06) | 2.03 (0.64-6.41) |
| <b>Pancreatic cancer</b>         |                                                              |                  |                  |                  |                  |
| BMI 18.5-24.9 kg/m <sup>2</sup>  | 1 (Reference)                                                | 0.92 (0.62-1.37) | 1.2 (0.81-1.78)  | 1.67 (1.07-2.59) | 1.4 (0.59-3.30)  |
| BMI 25-29.9 kg/m <sup>2</sup>    | 1.02 (0.67-1.56)                                             | 1.15 (0.80-1.66) | 1.34 (0.93-1.92) | 1.19 (0.79-1.81) | 1.11 (0.55-2.22) |
| <b>Liver cancer</b>              |                                                              |                  |                  |                  |                  |
| BMI 18.5-24.9 kg/m <sup>2</sup>  | 1 (Reference)                                                | 1.74 (0.93-3.24) | 1.7 (0.9-3.22)   | 2.5 (1.25-5)     | 3.87 (1.47-10.2) |
| BMI 25-29.9 kg/m <sup>2</sup>    | 1.49 (0.75-2.94)                                             | 1.36 (0.74-2.53) | 1.69 (0.93-3.1)  | 2.37 (1.26-4.45) | 2.39 (0.99-5.78) |
| <b>Colorectal cancer</b>         |                                                              |                  |                  |                  |                  |
| BMI 18.5-24.9 kg/m <sup>2</sup>  | 1 (Reference)                                                | 1.04 (0.87-1.24) | 1.16 (0.97-1.39) | 1.3 (1.05-1.62)  | 1.07 (0.69-1.67) |
| BMI 25-29.9 kg/m <sup>2</sup>    | 1.07 (0.88-1.3)                                              | 1.18 (0.99-1.39) | 1.27 (1.07-1.5)  | 1.61 (1.35-1.93) | 1.51 (1.14-1.99) |
| <b>Breast cancer</b>             |                                                              |                  |                  |                  |                  |
| BMI 18.5-24.9 kg/m <sup>2</sup>  | 1 (Reference)                                                | 1.11 (0.99-1.24) | 1.17 (1.04-1.31) | 1.29 (1.12-1.5)  | 1.19 (0.87-1.62) |
| BMI 25-29.9 kg/m <sup>2</sup>    | 1.08 (0.94-1.23)                                             | 1.16 (1.03-1.3)  | 1.3 (1.16-1.46)  | 1.27 (1.10-1.46) | 1.47 (1.13-1.91) |
| <b>Ovarian cancer</b>            |                                                              |                  |                  |                  |                  |
| BMI 18.5-24.9 kg/m <sup>2</sup>  | 1 (Reference)                                                | 0.9 (0.66-1.24)  | 0.83 (0.59-1.16) | 0.78 (0.49-1.24) | 0.41 (0.10-1.66) |
| BMI 25-29.9 kg/m <sup>2</sup>    | 0.86 (0.59-1.24)                                             | 0.95 (0.70-1.30) | 0.97 (0.7-1.33)  | 1.21 (0.82-1.77) | 1.78 (0.94-3.38) |
| <b>Endometrial cancer</b>        |                                                              |                  |                  |                  |                  |
| BMI 18.5-24.9 kg/m <sup>2</sup>  | 1 (Reference)                                                | 0.96 (0.68-1.35) | 0.68 (0.46-0.99) | 0.86 (0.53-1.4)  | 0 (0-inf)        |
| BMI 25-29.9 kg/m <sup>2</sup>    | 1.44 (1.01-2.05)                                             | 1.28 (0.93-1.77) | 1.1 (0.78-1.55)  | 1.25 (0.83-1.89) | 0.58 (0.18-1.86) |
| <b>Kidney cancer</b>             |                                                              |                  |                  |                  |                  |
| BMI 18.5-24.9 kg/m <sup>2</sup>  | 1 (Reference)                                                | 1.33 (0.86-2.07) | 1.15 (0.72-1.83) | 1.52 (0.9-2.59)  | 2.47 (1.13-5.43) |
| BMI 25-29.9 kg/m <sup>2</sup>    | 1.57 (0.99-2.49)                                             | 1.69 (1.12-2.56) | 2.2 (1.47-3.29)  | 2.34 (1.52-3.6)  | 1.66 (0.84-3.27) |
| <b>Hypertension</b>              |                                                              |                  |                  |                  |                  |
| BMI 18.5-24.9 kg/m <sup>2</sup>  | 1 (Reference)                                                | 1.02 (0.97-1.08) | 1.15 (1.09-1.21) | 1.41 (1.32-1.49) | 1.76 (1.59-1.95) |
| BMI 25-29.9 kg/m <sup>2</sup>    | 1.67 (1.58-1.75)                                             | 1.69 (1.61-1.77) | 1.81 (1.73-1.89) | 1.99 (1.89-2.09) | 2.31 (2.15-2.48) |
| <b>Ischemic heart disease</b>    |                                                              |                  |                  |                  |                  |
| BMI 18.5-24.9 kg/m <sup>2</sup>  | 1 (Reference)                                                | 1.08 (0.99-1.17) | 1.22 (1.13-1.32) | 1.53 (1.4-1.68)  | 1.92 (1.65-2.22) |
| BMI 25-29.9 kg/m <sup>2</sup>    | 1.49 (1.38-1.62)                                             | 1.59 (1.48-1.71) | 1.73 (1.61-1.86) | 1.88 (1.74-2.03) | 2.00 (1.79-2.23) |
| <b>Pulmonary embolism</b>        |                                                              |                  |                  |                  |                  |
| BMI 18.5-24.9 kg/m <sup>2</sup>  | 1 (Reference)                                                | 1.05 (0.83-1.32) | 1.15 (0.91-1.45) | 1.68 (1.30-2.19) | 2.48 (1.67-3.70) |
| BMI 25-29.9 kg/m <sup>2</sup>    | 1.78 (1.42-2.24)                                             | 1.58 (1.28-1.95) | 1.74 (1.41-2.15) | 1.77 (1.41-2.22) | 1.82 (1.29-2.56) |

<sup>a</sup>HR adjusted for age, sex, and Townsend deprivation index, Healthy lifestyle score included 4 lifestyle factors (never smoking, no or moderate alcohol consumption, physical activity, healthy diet). Participants scored 1 if they met the criterion for a healthy lifestyle and 0 otherwise

| Diseases                        | Healthy lifestyle score<br>Adjusted HR (95% CI) <sup>a</sup> |                  |                  |                  |                   |
|---------------------------------|--------------------------------------------------------------|------------------|------------------|------------------|-------------------|
|                                 | 4                                                            | 3                | 2                | 1                | 0                 |
| <b>Arrhythmias</b>              |                                                              |                  |                  |                  |                   |
| BMI 18.5-24.9 kg/m <sup>2</sup> | 1 (Reference)                                                | 0.98 (0.90-1.07) | 1.08 (0.99-1.18) | 1.21 (1.09-1.35) | 1.43 (1.19-1.72)  |
| BMI 25-29.9 kg/m <sup>2</sup>   | 1.03 (0.94-1.13)                                             | 1.11 (1.12-1.32) | 1.22 (1.12-1.32) | 1.29 (1.18-1.41) | 1.29 (1.12-1.48)  |
| <b>Heart failure</b>            |                                                              |                  |                  |                  |                   |
| BMI 18.5-24.9 kg/m <sup>2</sup> | 1 (Reference)                                                | 1.06 (0.88-1.27) | 1.32 (1.10-1.58) | 1.74 (1.43-2.13) | 2.29 (1.68-3.12)  |
| BMI 25-29.9 kg/m <sup>2</sup>   | 1.27 (1.05-1.53)                                             | 1.32 (1.12-1.56) | 1.55 (1.31-1.82) | 2.05 (1.72-2.43) | 2.19 (1.73-2.78)  |
| <b>Cerebrovascular diseases</b> |                                                              |                  |                  |                  |                   |
| BMI 18.5-24.9 kg/m <sup>2</sup> | 1 (Reference)                                                | 0.94 (0.83-1.08) | 1.18 (1.04-1.35) | 1.50 (1.30-1.74) | 1.98 (1.56-2.51)  |
| BMI 25-29.9 kg/m <sup>2</sup>   | 1.03 (0.9-1.19)                                              | 1.1 (0.97-1.24)  | 1.23 (1.09-1.38) | 1.46 (1.28-1.66) | 1.96 (1.63-2.34)  |
| <b>Arteriosclerosis</b>         |                                                              |                  |                  |                  |                   |
| BMI 18.5-24.9 kg/m <sup>2</sup> | 1 (Reference)                                                | 1.05 (0.49-2.26) | 2.23 (1.11-4.49) | 4.5 (2.21-9.14)  | 8.27 (3.57-19.19) |
| BMI 25-29.9 kg/m <sup>2</sup>   | 0.79 (0.33-1.89)                                             | 1.52 (0.77-3.04) | 2.28 (1.17-4.43) | 4.45 (2.29-8.66) | 2.83 (1.15-6.99)  |
| <b>Deep vein thrombosis</b>     |                                                              |                  |                  |                  |                   |
| BMI 18.5-24.9 kg/m <sup>2</sup> | 1 (Reference)                                                | 0.85 (0.69-1.05) | 1.03 (0.84-1.27) | 1.26 (0.98-1.61) | 1.81 (1.22-2.68)  |
| BMI 25-29.9 kg/m <sup>2</sup>   | 1.34 (1.08-1.65)                                             | 1.19 (0.98-1.44) | 1.2 (0.99-1.45)  | 1.24 (1-1.54)    | 1.31 (0.94-1.84)  |
| <b>Asthma</b>                   |                                                              |                  |                  |                  |                   |
| BMI 18.5-24.9 kg/m <sup>2</sup> | 1 (Reference)                                                | 1.02 (0.94-1.1)  | 1.05 (0.97-1.13) | 1.17 (1.06-1.3)  | 1.53 (1.3-1.82)   |
| BMI 25-29.9 kg/m <sup>2</sup>   | 1.26 (1.16-1.37)                                             | 1.29 (1.2-1.39)  | 1.29 (1.2-1.39)  | 1.37 (1.26-1.49) | 1.78 (1.55-2.05)  |
| <b>Liver disease</b>            |                                                              |                  |                  |                  |                   |
| BMI 18.5-24.9 kg/m <sup>2</sup> | 1 (Reference)                                                | 1.19 (0.98-1.45) | 1.6 (1.32-1.95)  | 2.46 (1.99-3.03) | 3.05 (2.23-4.18)  |
| BMI 25-29.9 kg/m <sup>2</sup>   | 1.53 (1.25-1.89)                                             | 1.91 (1.59-2.29) | 2.11 (1.76-2.53) | 2.49 (2.06-3.02) | 3.22 (2.51-4.15)  |
| <b>Renal failure</b>            |                                                              |                  |                  |                  |                   |
| BMI 18.5-24.9 kg/m <sup>2</sup> | 1 (Reference)                                                | 0.99 (0.88-1.12) | 1.23 (1.09-1.38) | 1.62 (1.41-1.85) | 1.88 (1.51-2.36)  |
| BMI 25-29.9 kg/m <sup>2</sup>   | 1.37 (1.21-1.54)                                             | 1.43 (1.28-1.59) | 1.61 (1.45-1.79) | 1.87 (1.67-2.1)  | 2.09 (1.78-2.46)  |
| <b>Gout</b>                     |                                                              |                  |                  |                  |                   |
| BMI 18.5-24.9 kg/m <sup>2</sup> | 1 (Reference)                                                | 1.30 (0.82-2.05) | 1.74 (1.11-2.72) | 2.13 (1.3-3.49)  | 3.40 (1.75-6.62)  |
| BMI 25-29.9 kg/m <sup>2</sup>   | 2.42 (1.56-3.76)                                             | 3.23 (2.16-4.83) | 4.10 (2.75-6.11) | 5.23 (3.49-7.85) | 7.40 (4.71-11.61) |
| <b>Osteoarthritis</b>           |                                                              |                  |                  |                  |                   |
| BMI 18.5-24.9 kg/m <sup>2</sup> | 1 (Reference)                                                | 1.1 (1.02-1.17)  | 1.16 (1.08-1.24) | 1.28 (1.18-1.4)  | 1.15 (0.97-1.36)  |
| BMI 25-29.9 kg/m <sup>2</sup>   | 1.60 (1.49-1.71)                                             | 1.75 (1.64-1.86) | 1.81 (1.7-1.93)  | 1.89 (1.76-2.02) | 1.84 (1.66-2.05)  |
| <b>Sleep disorders</b>          |                                                              |                  |                  |                  |                   |
| BMI 18.5-24.9 kg/m <sup>2</sup> | 1 (Reference)                                                | 1.06 (0.81-1.38) | 1.05 (0.8-1.37)  | 1.41 (1.04-1.91) | 1.43 (0.84-2.45)  |
| BMI 25-29.9 kg/m <sup>2</sup>   | 1.69 (1.3-2.2)                                               | 1.80 (1.42-2.29) | 2.06 (1.63-2.61) | 2.42 (1.89-3.1)  | 2.48 (1.76-3.48)  |
| <b>Mood disorders</b>           |                                                              |                  |                  |                  |                   |
| BMI 18.5-24.9 kg/m <sup>2</sup> | 1 (Reference)                                                | 1.24 (1.12-1.39) | 1.49 (1.34-1.65) | 1.98 (1.76-2.24) | 2.5 (2.06-3.03)   |
| BMI 25-29.9 kg/m <sup>2</sup>   | 1.40 (1.25-1.58)                                             | 1.58 (1.43-1.75) | 1.82 (1.65-2.02) | 2.06 (1.85-2.31) | 2.49 (2.12-2.92)  |

<sup>a</sup>HR adjusted for age, sex, and Townsend deprivation index, Healthy lifestyle score included 4 lifestyle factors (never smoking, no or moderate alcohol consumption, physical activity, healthy diet). Participants scored 1 if they met the criterion for a healthy lifestyle and 0 otherwise

**eTable 8. Associations of Body Mass Index With All-Cause Mortality by Healthy Lifestyle Score**

| All-cause mortality             | Healthy lifestyle score<br>Adjusted HR (95% CI) <sup>a</sup> |                  |                  |                  |                  |
|---------------------------------|--------------------------------------------------------------|------------------|------------------|------------------|------------------|
|                                 | 4                                                            | 3                | 2                | 1                | 0                |
| BMI 18.5-24.9 kg/m <sup>2</sup> | 1 (Reference)                                                | 1.28 (1.14-1.43) | 1.63 (1.46-1.82) | 2.27 (2.01-2.56) | 3.16 (2.65-3.77) |
| BMI 25-29.9 kg/m <sup>2</sup>   | 1.03 (0.90-1.16)                                             | 1.21 (1.09-1.35) | 1.47 (1.32-1.63) | 1.85 (1.65-2.06) | 2.25 (1.93-2.62) |
| BMI ≥ 30 kg/m <sup>2</sup>      | 1.37 (1.19-1.57)                                             | 1.57 (1.40-1.76) | 1.99 (1.78-2.21) | 2.21 (1.97-2.48) | 2.43 (2.06-2.86) |

HR, hazard ratio; CI, confidence interval, BMI, Body mass index  
<sup>a</sup>HR adjusted for age, sex, and Townsend deprivation index  
Healthy lifestyle score included 4 lifestyle factors (never smoking, no or moderate alcohol consumption, physical activity, healthy diet). Participants scored 1 if they met the criterion for a healthy lifestyle and 0 otherwise

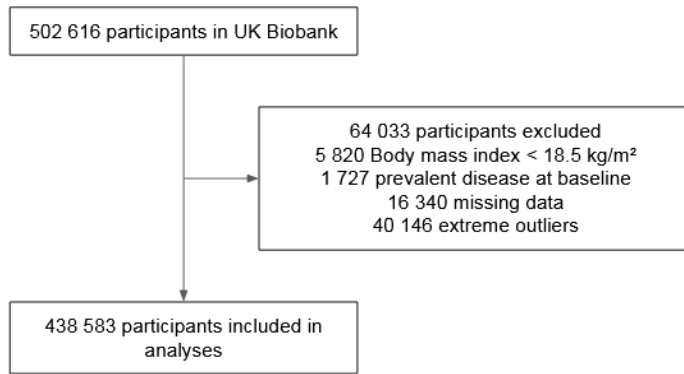

**eFigure 1. Flowchart of Sample Selection**

## eFigure 2. Hazard Ratios for Incident Diseases by Body Mass Index Category

BMI, body mass index; HR, hazard ratio; CI, confidence interval  
 Hazard ratios (95% CI) for obesity (BMI  $\geq 30.0$  kg/m<sup>2</sup>) and overweight (25-29.9 kg/m<sup>2</sup>) versus healthy weight (18.5–24.9 kg/m<sup>2</sup>) were calculated in Cox proportional hazards models. All the p-values are presented after Bonferroni multiple testing adjustments. Healthy lifestyle score included 4 lifestyle factors (never smoking, no or moderate alcohol consumption, physical activity, healthy diet). Individuals scored 1 if they met the criterion for a healthy lifestyle and 0 otherwise

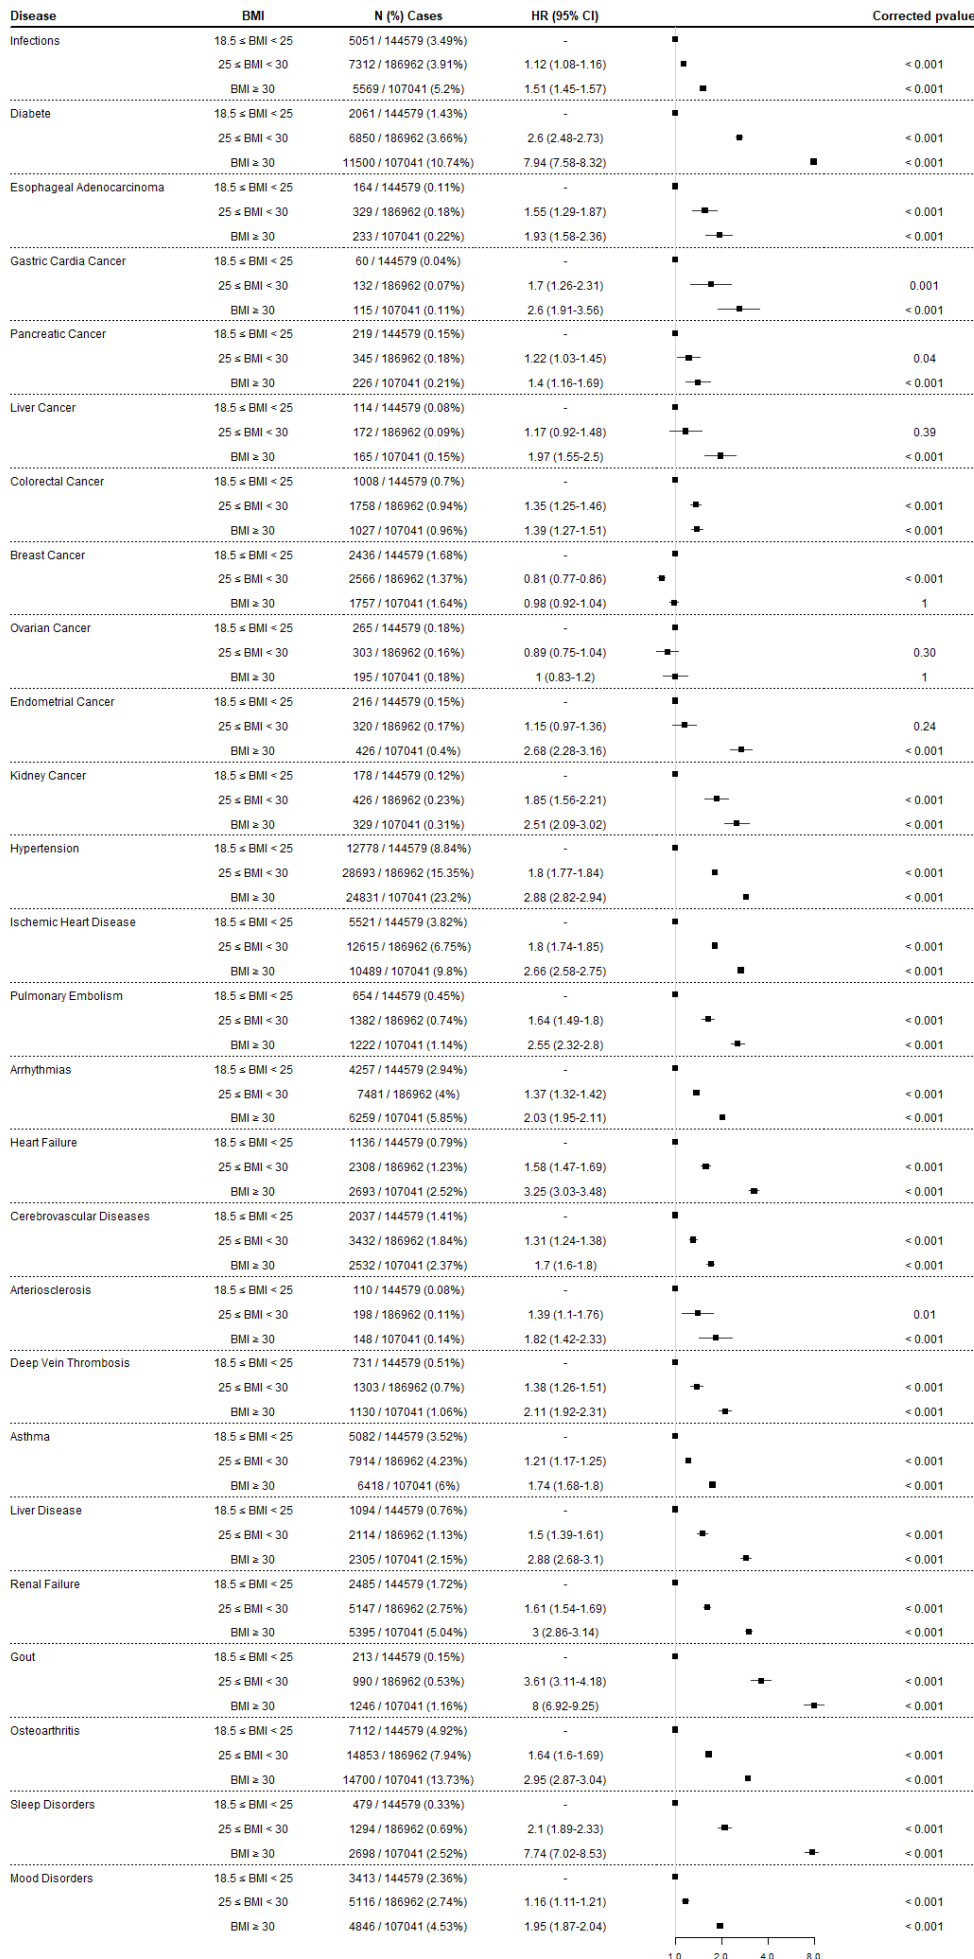

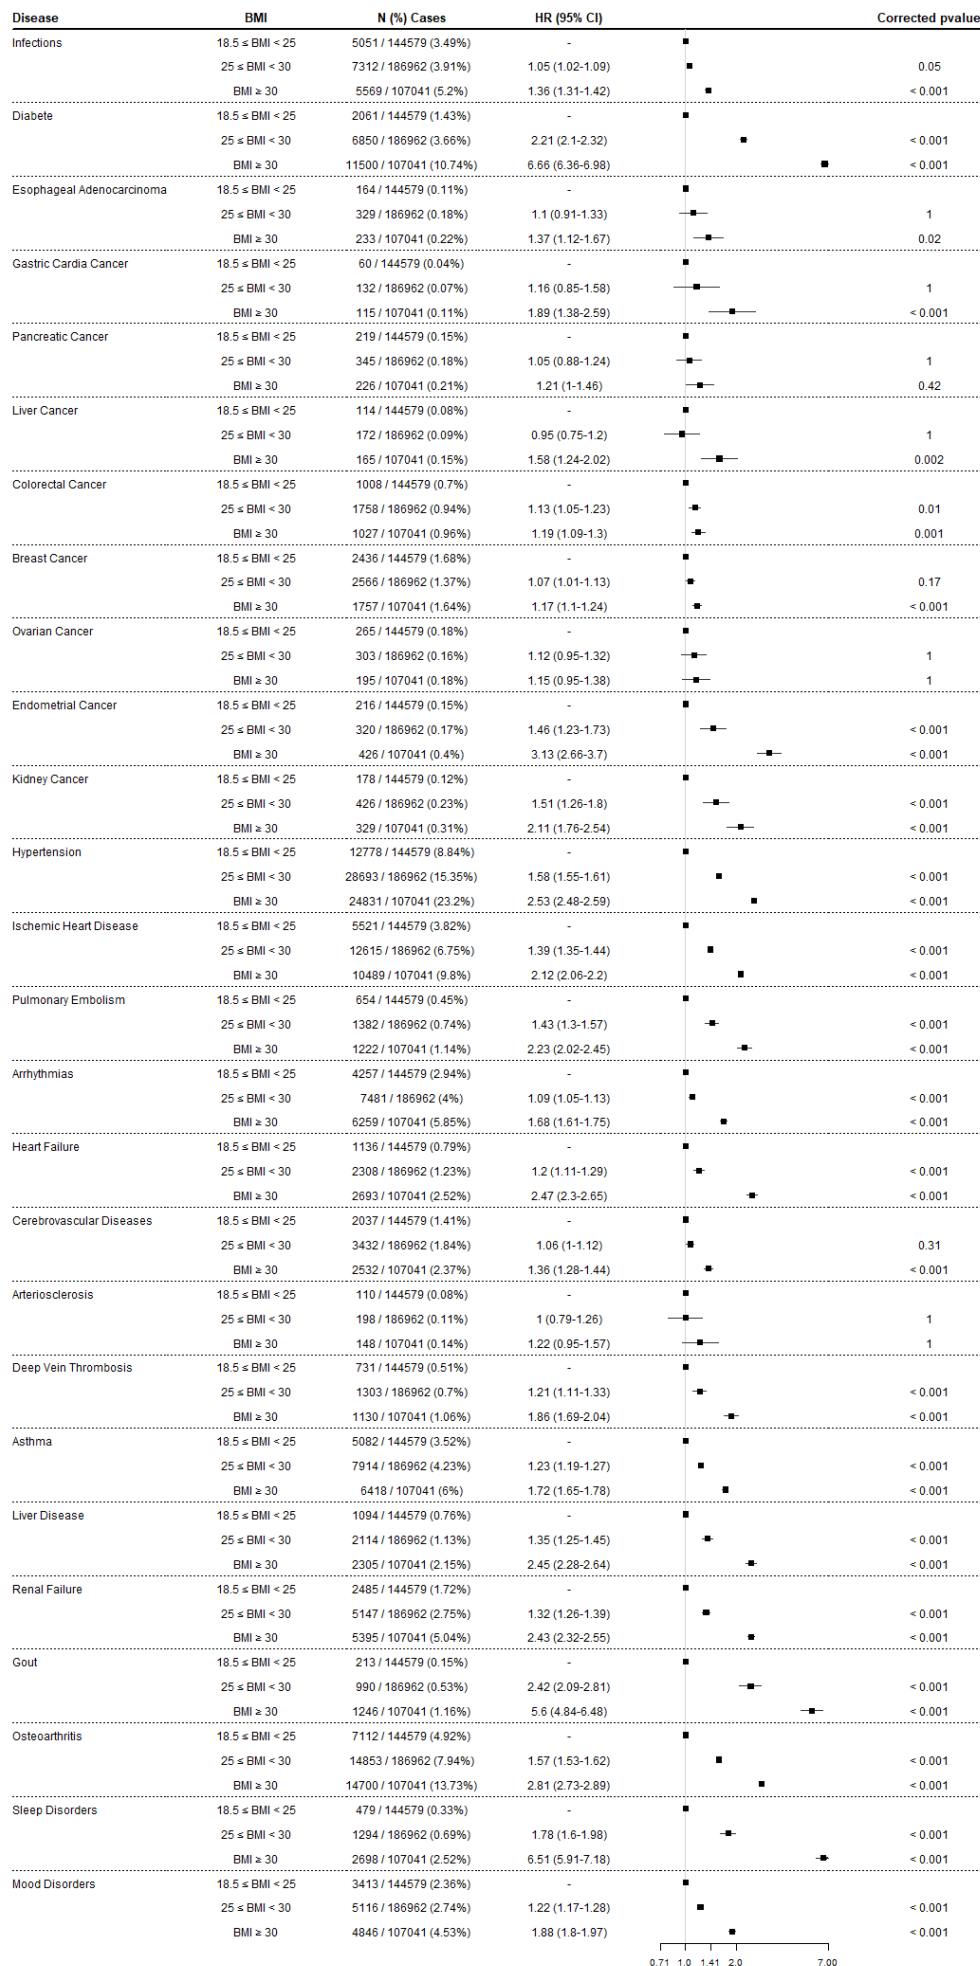

### eFigure 3. Adjusted Hazard Ratios for Incident Diseases by Body Mass Index Category

BMI, body mass index; HR, hazard ratio; CI, confidence interval

Hazard ratios (95% CI) for obesity (BMI ≥30.0 kg/m<sup>2</sup>) and overweight (25-29.9 kg/m<sup>2</sup>) versus healthy weight (18.5–24.9 kg/m<sup>2</sup>) were calculated in Cox proportional hazards models after adjustment of age, sex, Townsend deprivation index, and healthy lifestyle score. All the p-values are presented after Bonferroni multiple testing adjustments. Healthy lifestyle score included 4 lifestyle factors (never smoking, no or moderate alcohol consumption, physical activity, healthy diet). Individuals scored 1 if they met the criterion for a healthy lifestyle and 0 otherwise

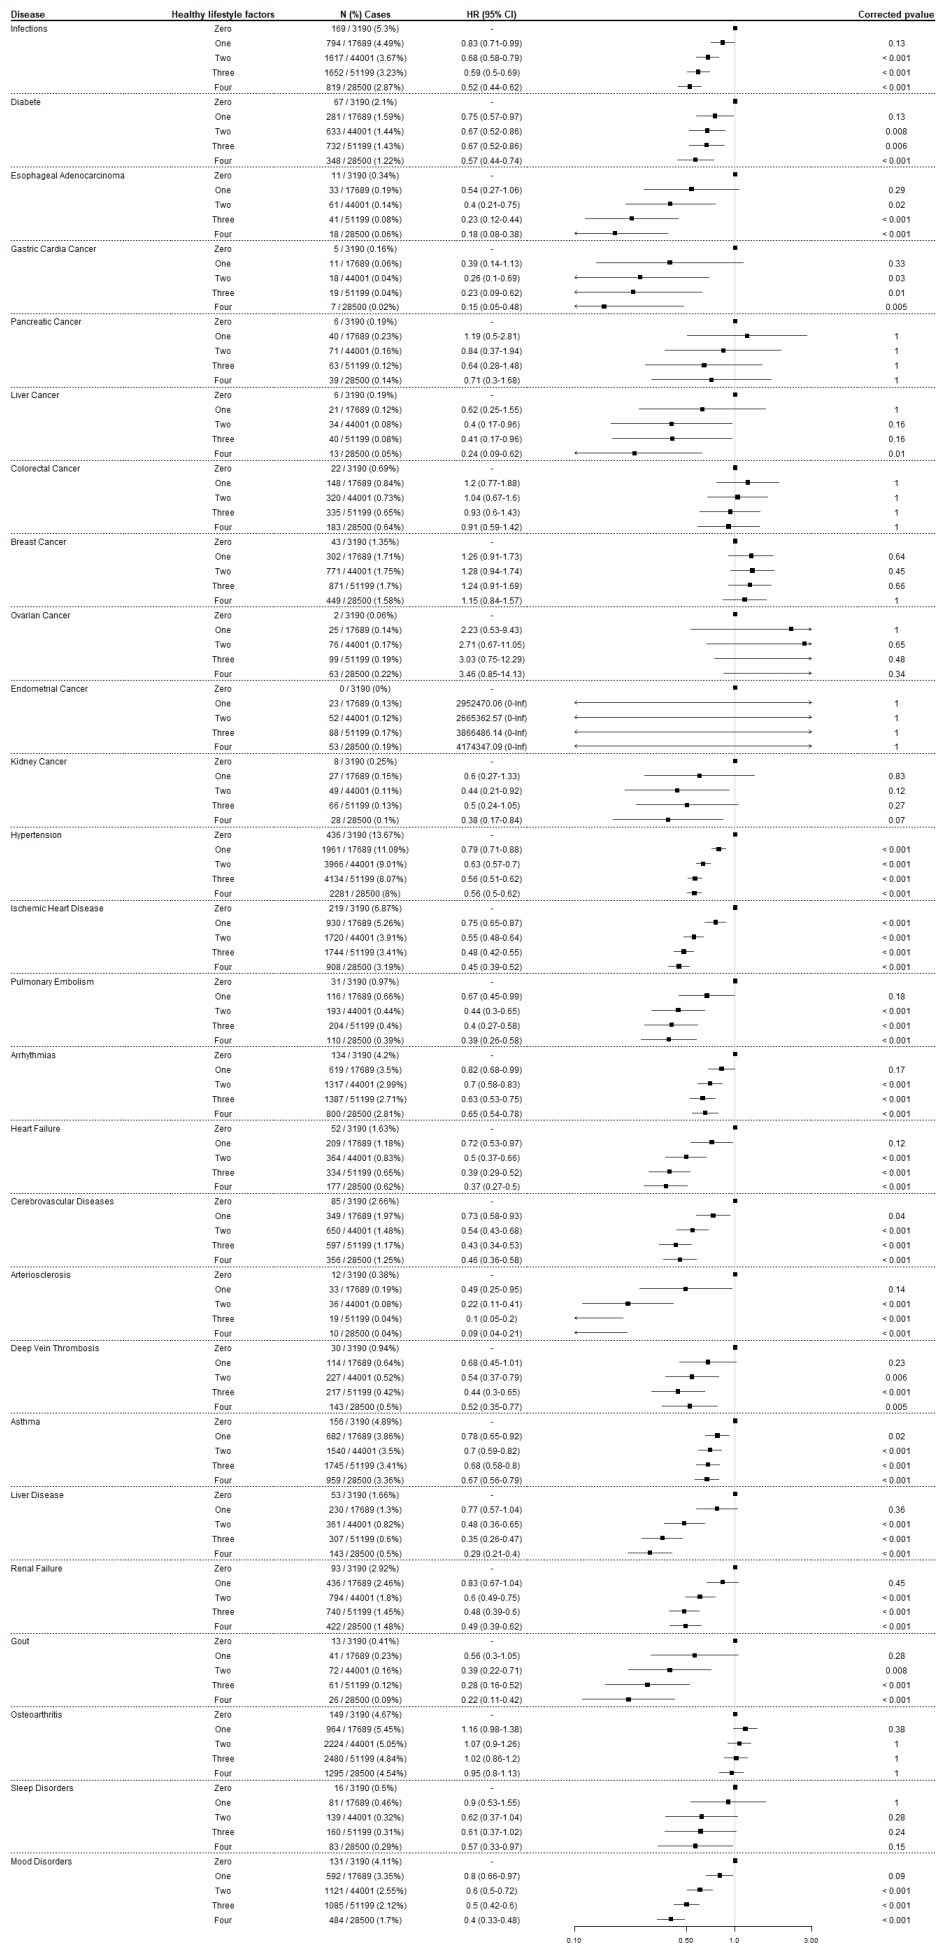

## eFigure 4 A. Hazard Ratios for Incident Diseases by Lifestyle Profile in Individuals With Normal Weight (BMI 18.5-24.9)

BMI, body mass index; HR, hazard ratio; CI, confidence interval

Hazard ratios (95% CI) for a lifestyle score equal to 1, 2, 3 or 4 versus a lifestyle score equal to zero were calculated in Cox proportional hazards models. All the p-values are presented after Bonferroni multiple testing adjustments.

For each lifestyle factor, individuals scored 1 if they met the criterion for a healthy lifestyle (never smoking, no or moderate alcohol consumption, physical activity, or healthy diet) and 0 otherwise. The healthy lifestyle score was computed by summing the four scores. It ranged between zero (lowest healthy score) and 4 (highest healthy score).

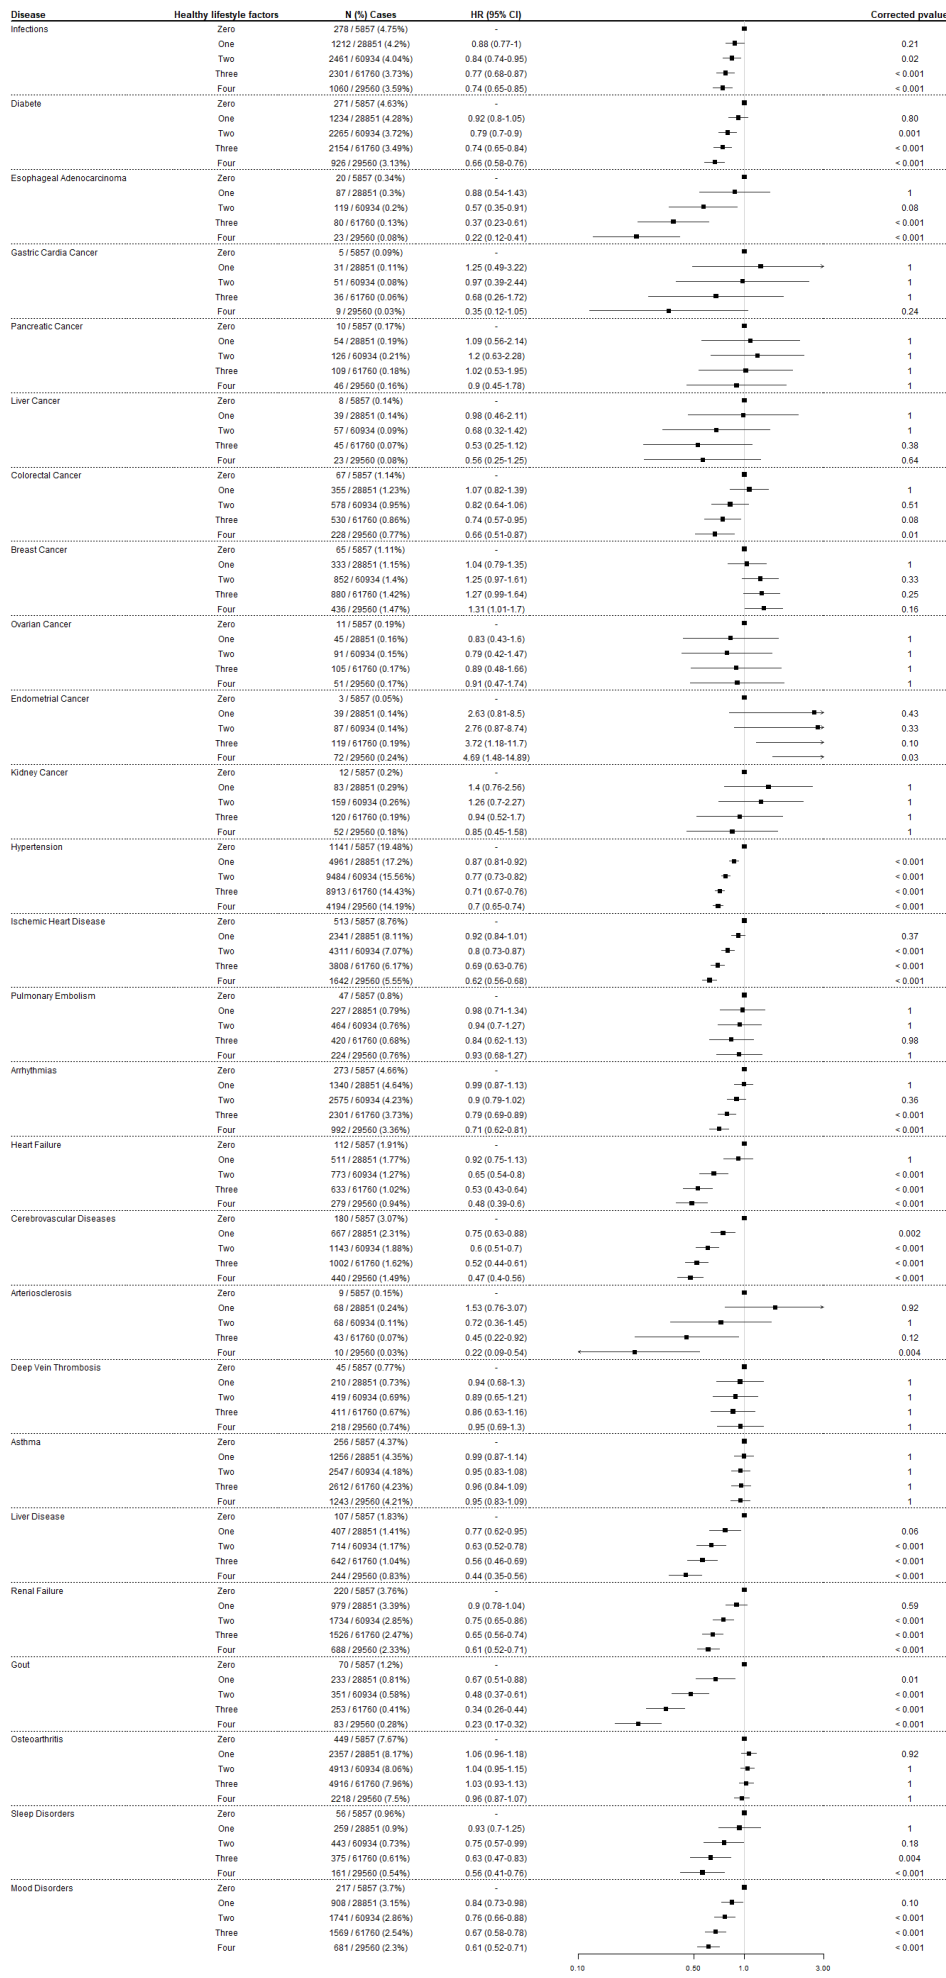

## eFigure 4 B. Hazard Ratios for Incident Diseases by Lifestyle Profile in Individuals With Overweight (BMI 25-29.9)

BMI, body mass index; HR, hazard ratio; CI, confidence interval

Hazard ratios (95% CI) for a lifestyle score equal to 1, 2, 3 or 4 versus a lifestyle score equal to zero were calculated in Cox proportional hazards models. All the p-values are presented after Bonferroni multiple testing adjustments.

For each lifestyle factor, individuals scored 1 if they met the criterion for a healthy lifestyle (never smoking, no or moderate alcohol consumption, physical activity, or healthy diet) and 0 otherwise. The healthy lifestyle score was computed by summing the four scores. It ranged between zero (lowest healthy score) and 4 (highest healthy score).



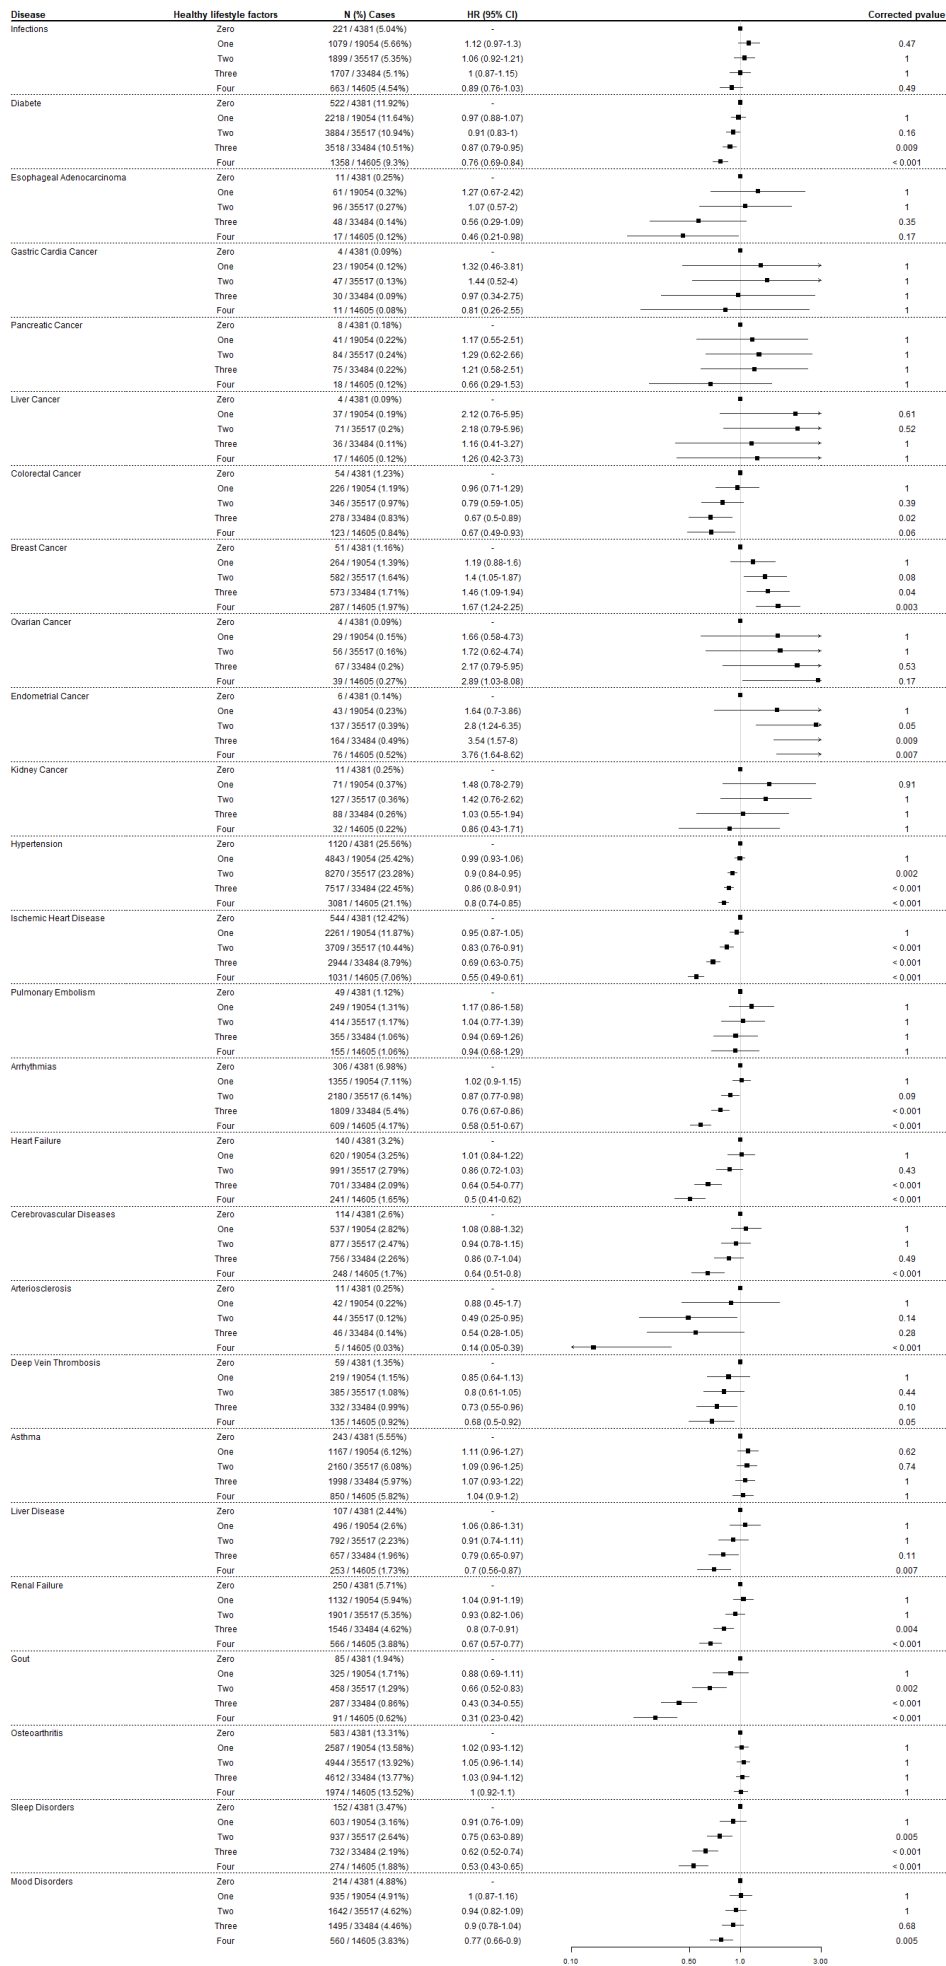

## eFigure 4 C. Hazard Ratios for Incident Diseases by Lifestyle Profile in Individuals With Obesity (BMI ≥30)

BMI, body mass index; HR, hazard ratio; CI, confidence interval

Hazard ratios (95% CI) for a lifestyle score equal to 1, 2, 3 or 4 versus a lifestyle score equal to zero were calculated in Cox proportional hazards models. All the p-values are presented after Bonferroni multiple testing adjustments.

For each lifestyle factor, individuals scored 1 if they met the criterion for a healthy lifestyle (never smoking, no or moderate alcohol consumption, physical activity, or healthy diet) and 0 otherwise. The healthy lifestyle score was computed by summing the four scores. It ranged between zero (lowest healthy score) and 4 (highest healthy score).

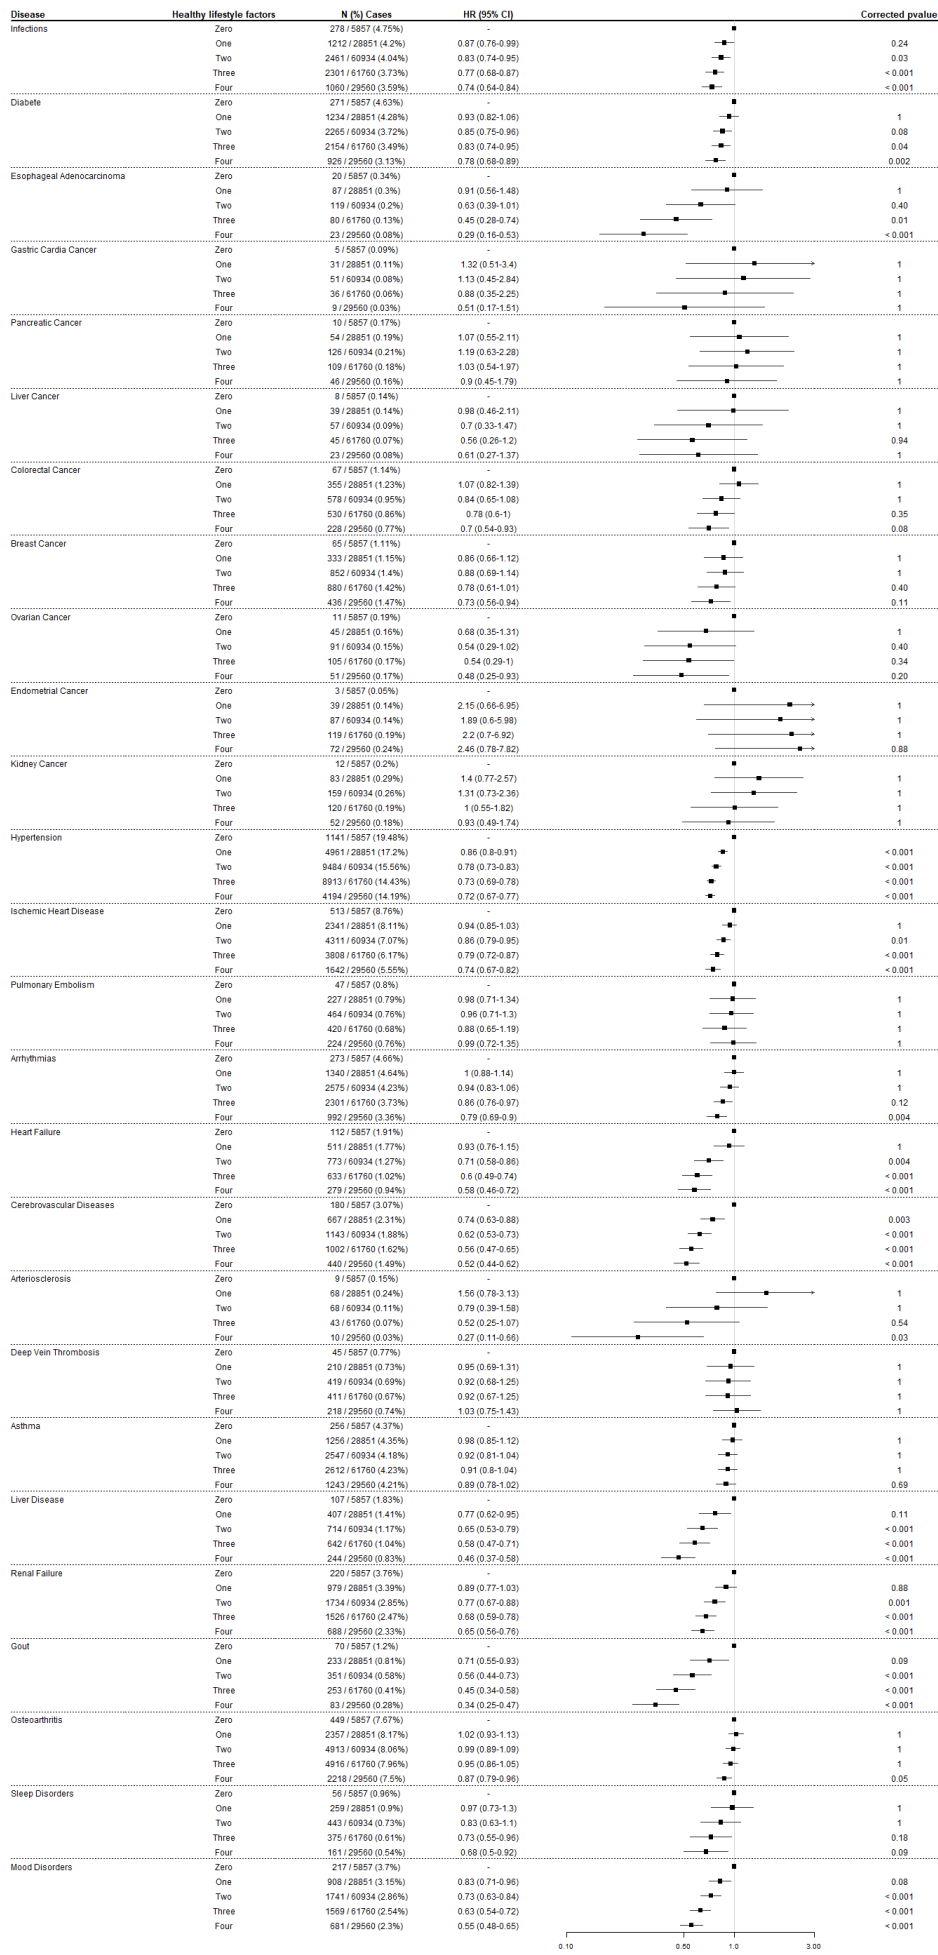

## eFigure 5. Adjusted Hazard Ratios for Incident Diseases by Lifestyle Profile in Individuals With Overweight (BMI 25-29.9)

BMI, body mass index; HR, hazard ratio; CI, confidence interval

Hazard ratios (95% CI) for a lifestyle score equal to 1, 2, 3 or 4 versus a lifestyle score equal to zero were calculated in Cox proportional hazards models after adjustment of age, sex, Townsend deprivation index. All the p-values are presented after Bonferroni multiple testing adjustments.

For each lifestyle factor, individuals scored 1 if they met the criterion for a healthy lifestyle (never smoking, no or moderate alcohol consumption, physical activity, or healthy diet) and 0 otherwise. The healthy lifestyle score was computed by summing the four scores. It ranged between zero (lowest healthy score) and 4 (highest healthy score).

A.

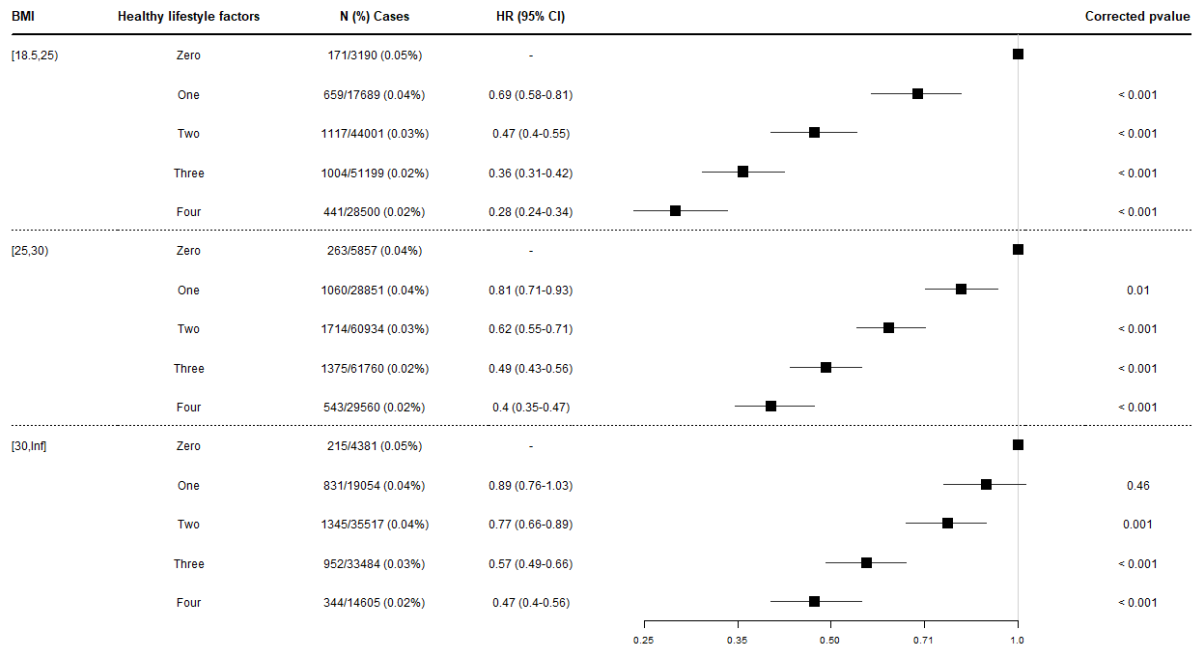

B.

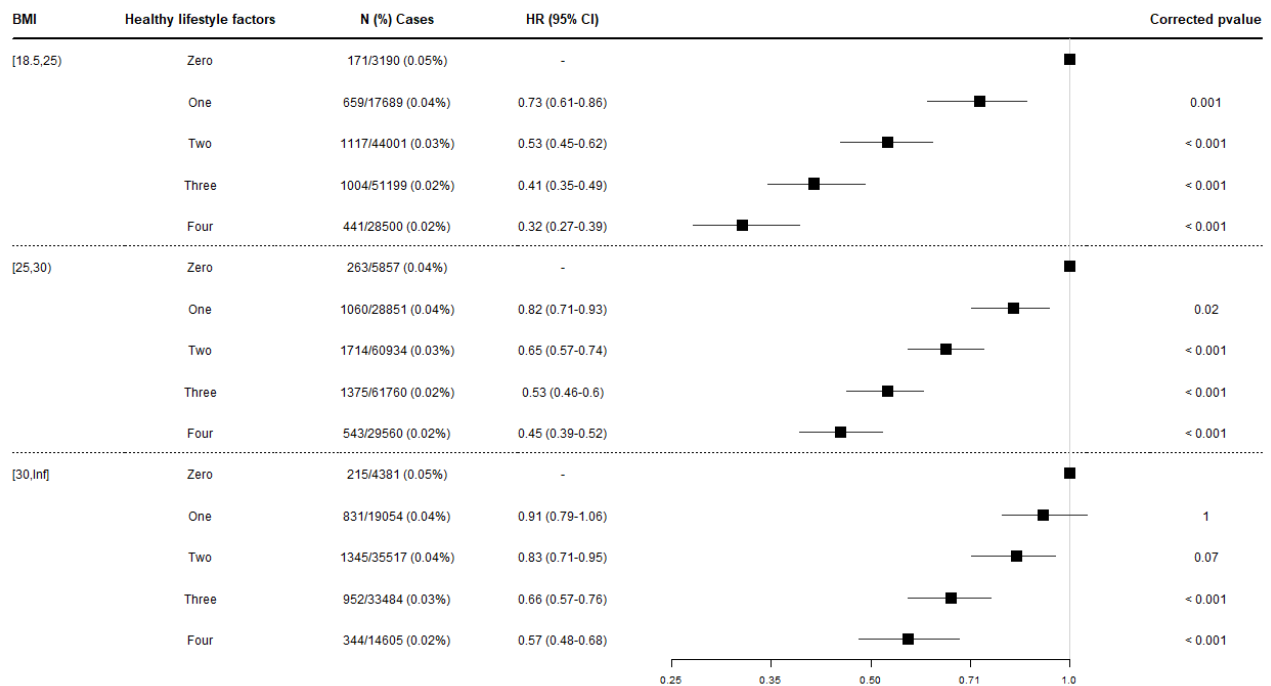

**eFigure 6. Hazard ratios for All-Cause Mortality by Lifestyle Profile in Individuals With Normal Weight (BMI 18.5-24.9), Overweight (BMI 25-29.9), and Obesity (BMI ≥30) Before (A) and After Adjustment (B) for Age, Sex, and Townsend Deprivation Index**

BMI, body mass index; HR, hazard ratio; CI, confidence interval

Hazard ratios (95% CI) for a lifestyle score equal to 1, 2, 3 or 4 versus a lifestyle score equal to zero were calculated in Cox proportional hazards models. All the p-values are presented after Bonferroni multiple testing adjustments.

For each lifestyle factor, individuals scored 1 if they met the criterion for a healthy lifestyle (never smoking, no or moderate alcohol consumption, physical activity, or healthy diet) and 0 otherwise. The healthy lifestyle score was computed by summing the four scores. It ranged between zero (lowest healthy score) and 4 (highest healthy score).

**eTable 9.** Associations of Body Mass Index With Incident Diseases by Healthy Lifestyle Score After Exclusion of Participants With Diseases Diagnosed Within the First 2 Years of Follow-up

| Diseases                         | Healthy lifestyle score<br>Adjusted HR (95% CI) <sup>a</sup> |                  |                  |                   |                   |
|----------------------------------|--------------------------------------------------------------|------------------|------------------|-------------------|-------------------|
|                                  | 4                                                            | 3                | 2                | 1                 | 0                 |
| <b>Infections</b>                |                                                              |                  |                  |                   |                   |
| BMI 18.5-24.9 kg/m <sup>2</sup>  | 1 (Reference)                                                | 1.12 (1.02-1.23) | 1.27 (1.16-1.39) | 1.53 (1.37-1.71)  | 1.90 (1.58-2.29)  |
| BMI 25-29.9 kg/m <sup>2</sup>    | 1.21 (1.09-1.34)                                             | 1.24 (1.14-1.36) | 1.33 (1.22-1.46) | 1.41 (1.28-1.56)  | 1.59 (1.36-1.86)  |
| BMI ≥ 30 kg/m <sup>2</sup>       | 1.45 (1.29-1.62)                                             | 1.66 (1.51-1.82) | 1.65 (1.5-1.81)  | 1.85 (1.67-2.05)  | 1.59 (1.34-1.9)   |
| <b>Diabetes</b>                  |                                                              |                  |                  |                   |                   |
| BMI 18.5-24.9 kg/m <sup>2</sup>  | 1 (Reference)                                                | 1.18 (1.01-1.37) | 1.19 (1.02-1.40) | 1.24 (1.03-1.50)  | 1.43 (1.03-1.98)  |
| BMI 25-29.9 kg/m <sup>2</sup>    | 2.47 (2.13-2.87)                                             | 2.69 (2.35-3.09) | 2.75 (2.40-3.15) | 3.16 (2.74-3.65)  | 3.29 (2.73-3.98)  |
| BMI ≥ 30 kg/m <sup>2</sup>       | 8.04 (6.98-9.26)                                             | 8.54 (7.48-9.75) | 8.43 (7.38-9.62) | 8.84 (7.71-10.13) | 8.85 (7.52-10.42) |
| <b>Esophageal adenocarcinoma</b> |                                                              |                  |                  |                   |                   |
| BMI 18.5-24.9 kg/m <sup>2</sup>  | 1 (Reference)                                                | 0.97 (0.51-1.83) | 1.93 (1.08-3.47) | 2.07 (1.06-4.01)  | 3.10 (1.20-1.80)  |
| BMI 25-29.9 kg/m <sup>2</sup>    | 0.97 (0.49-1.93)                                             | 1.38 (0.78-2.45) | 2.13 (1.23-3.69) | 2.99 (1.70-5.27)  | 3.86 (1.92-7.74)  |
| BMI ≥ 30 kg/m <sup>2</sup>       | 1.81 (0.87-3.76)                                             | 1.53 (0.82-2.85) | 2.96 (1.69-5.18) | 2.94 (1.62-5.36)  | 2.52 (1.07-5.96)  |
| <b>Gastric cardia cancer</b>     |                                                              |                  |                  |                   |                   |
| BMI 18.5-24.9 kg/m <sup>2</sup>  | 1 (Reference)                                                | 1.04 (0.41-2.6)  | 1.11 (0.44-2.82) | 1.25 (0.42-3.71)  | 2.17 (0.45-10.45) |
| BMI 25-29.9 kg/m <sup>2</sup>    | 0.67 (0.23-2.0)                                              | 1.26 (0.54-2.91) | 2.06 (0.92-4.57) | 2.02 (0.86-4.45)  | 1.75 (0.51-6.01)  |
| BMI ≥ 30 kg/m <sup>2</sup>       | 2.93 (1.12-7.71)                                             | 2.21 (0.93-5.23) | 3.49 (1.55-7.83) | 1.72 (0.67-4.46)  | 2.51 (0.73-8.61)  |
| <b>Pancreatic cancer</b>         |                                                              |                  |                  |                   |                   |
| BMI 18.5-24.9 kg/m <sup>2</sup>  | 1 (Reference)                                                | 0.91 (0.58-1.44) | 1.18 (0.75-1.84) | 1.60 (0.96-2.67)  | 1.24 (0.44-3.53)  |
| BMI 25-29.9 kg/m <sup>2</sup>    | 1.09 (0.67-1.77)                                             | 1.19 (0.79-1.81) | 1.40 (0.93-2.11) | 1.32 (0.83-2.11)  | 1.21 (0.55-2.65)  |
| BMI ≥ 30 kg/m <sup>2</sup>       | 1.10 (0.61-2.00)                                             | 1.46 (0.93-2.29) | 1.65 (1.07-2.55) | 1.57 (0.95-2.59)  | 1.27 (0.53-3.06)  |
| <b>Liver cancer</b>              |                                                              |                  |                  |                   |                   |
| BMI 18.5-24.9 kg/m <sup>2</sup>  | 1 (Reference)                                                | 2.09 (1.00-4.37) | 1.78 (0.83-3.84) | 3.3 (1.48-7.36)   | 5.15 (1.72-15.38) |
| BMI 25-29.9 kg/m <sup>2</sup>    | 1.93 (0.88-4.24)                                             | 1.43 (0.68-3.01) | 1.70 (0.82-3.53) | 2.6 (1.22-5.54)   | 2.90 (1.03-8.16)  |
| BMI ≥ 30 kg/m <sup>2</sup>       | 3.29 (1.44-7.52)                                             | 2.15 (1-4.66)    | 3.62 (1.76-7.45) | 4.3 (2.02-9.18)   | 0.68 (0.09-5.4)   |
| <b>Colorectal cancer</b>         |                                                              |                  |                  |                   |                   |
| BMI 18.5-24.9 kg/m <sup>2</sup>  | 1 (Reference)                                                | 1.08 (0.88-1.33) | 1.18 (0.96-1.45) | 1.29 (1.00-1.66)  | 0.80 (0.45-1.45)  |
| BMI 25-29.9 kg/m <sup>2</sup>    | 1.14 (0.92-1.43)                                             | 1.19 (0.98-1.45) | 1.32 (1.09-1.60) | 1.75 (1.43-2.15)  | 1.27 (0.90-1.81)  |
| BMI ≥ 30 kg/m <sup>2</sup>       | 1.30 (0.99-1.69)                                             | 1.27 (1.03-1.58) | 1.40 (1.14-1.73) | 1.65 (1.31-2.08)  | 1.67 (1.16-2.41)  |
| <b>Breast cancer</b>             |                                                              |                  |                  |                   |                   |
| BMI 18.5-24.9 kg/m <sup>2</sup>  | 1 (Reference)                                                | 1.08 (0.95-1.23) | 1.17 (1.02-1.33) | 1.32 (1.11-1.55)  | 1.08 (0.74-1.56)  |
| BMI 25-29.9 kg/m <sup>2</sup>    | 1.06 (0.91-1.24)                                             | 1.17 (1.03-1.34) | 1.33 (1.17-1.51) | 1.26 (1.07-1.49)  | 1.45 (1.07-1.97)  |
| BMI ≥ 30 kg/m <sup>2</sup>       | 1.25 (1.05-1.48)                                             | 1.28 (1.11-1.47) | 1.4 (1.22-1.62)  | 1.45 (1.21-1.73)  | 1.46 (1.01-2.06)  |
| <b>Ovarian cancer</b>            |                                                              |                  |                  |                   |                   |
| BMI 18.5-24.9 kg/m <sup>2</sup>  | 1 (Reference)                                                | 1.04 (0.72-1.52) | 0.95 (0.64-1.40) | 0.83 (0.48-1.44)  | 0.60 (0.15-2.49)  |
| BMI 25-29.9 kg/m <sup>2</sup>    | 0.96 (0.62-1.48)                                             | 1.19 (0.82-1.71) | 1.19 (0.81-1.73) | 1.34 (0.85-2.11)  | 2.71 (1.40-5.25)  |
| BMI ≥ 30 kg/m <sup>2</sup>       | 1.29 (0.80-2.07)                                             | 1.18 (0.78-1.77) | 1.11 (0.73-1.70) | 1.34 (0.80-2.24)  | 0.99 (0.31-3.2)   |
| <b>Endometrial cancer</b>        |                                                              |                  |                  |                   |                   |
| BMI 18.5-24.9 kg/m <sup>2</sup>  | 1 (Reference)                                                | 1.05 (0.71-1.55) | 0.73 (0.47-1.13) | 0.87 (0.49-1.54)  | 0 (0-inf)         |
| BMI 25-29.9 kg/m <sup>2</sup>    | 1.48 (0.98-2.24)                                             | 1.41 (0.97-2.05) | 1.21 (0.82-1.8)  | 1.36 (0.84-2.19)  | 0.55 (0.13-2.28)  |
| BMI ≥ 30 kg/m <sup>2</sup>       | 2.93 (1.95-4.40)                                             | 3.00 (2.09-4.32) | 2.82 (1.94-4.1)  | 2.05 (1.27-3.3)   | 1.12 (0.35-3.62)  |
| <b>Kidney cancer</b>             |                                                              |                  |                  |                   |                   |
| BMI 18.5-24.9 kg/m <sup>2</sup>  | 1 (Reference)                                                | 1.18 (0.74-1.88) | 0.89 (0.54-1.48) | 1.06 (0.57-1.95)  | 1.37 (0.48-3.94)  |
| BMI 25-29.9 kg/m <sup>2</sup>    | 1.39 (0.85-2.27)                                             | 1.50 (0.97-2.32) | 1.97 (1.29-3.01) | 1.91 (1.20-3.03)  | 0.79 (0.30-2.05)  |
| BMI ≥ 30 kg/m <sup>2</sup>       | 1.86 (1.07-3.24)                                             | 2.07 (1.31-3.27) | 2.39 (1.54-3.73) | 2.71 (1.68-4.35)  | 1.79 (0.81-3.96)  |
| <b>Hypertension</b>              |                                                              |                  |                  |                   |                   |
| BMI 18.5-24.9 kg/m <sup>2</sup>  | 1 (Reference)                                                | 1.04 (0.98-1.11) | 1.16 (1.10-1.23) | 1.42 (1.33-1.53)  | 1.82 (1.62-2.04)  |
| BMI 25-29.9 kg/m <sup>2</sup>    | 1.70 (1.60-1.80)                                             | 1.72 (1.63-1.81) | 1.85 (1.76-1.95) | 2.02 (1.90-2.13)  | 2.31 (2.13-2.51)  |
| BMI ≥ 30 kg/m <sup>2</sup>       | 2.72 (2.55-2.89)                                             | 2.90 (2.74-3.06) | 2.93 (2.78-3.10) | 3.22 (3.04-3.41)  | 3.31 (3.05-3.60)  |
| <b>Ischemic heart disease</b>    |                                                              |                  |                  |                   |                   |
| BMI 18.5-24.9 kg/m <sup>2</sup>  | 1 (Reference)                                                | 1.08 (0.99-1.19) | 1.21 (1.10-1.33) | 1.49 (1.34-1.67)  | 2.02 (1.70-2.40)  |
| BMI 25-29.9 kg/m <sup>2</sup>    | 1.50 (1.36-1.65)                                             | 1.57 (1.44-1.71) | 1.72 (1.58-1.87) | 1.90 (1.74-2.08)  | 2.06 (1.81-2.34)  |
| BMI ≥ 30 kg/m <sup>2</sup>       | 2.13 (1.92-2.37)                                             | 2.41 (2.21-2.63) | 2.60 (2.38-2.83) | 2.83 (2.58-3.10)  | 2.94 (2.59-3.34)  |

| Diseases                        | Healthy lifestyle score<br>Adjusted HR (95% CI) <sup>a</sup> |                   |                    |                    |                    |
|---------------------------------|--------------------------------------------------------------|-------------------|--------------------|--------------------|--------------------|
|                                 | 4                                                            | 3                 | 2                  | 1                  | 0                  |
| <b>Pulmonary embolism</b>       |                                                              |                   |                    |                    |                    |
| BMI 18.5-24.9 kg/m <sup>2</sup> | 1 (Reference)                                                | 1.07 (0.82-1.39)  | 1.14 (0.87-1.49)   | 1.40 (1.03-1.92)   | 3.11 (2.04-4.75)   |
| BMI 25-29.9 kg/m <sup>2</sup>   | 1.75 (1.34-2.27)                                             | 1.58 (1.24-2.01)  | 1.84 (1.46-2.34)   | 1.70 (1.31-2.22)   | 1.74 (1.17-2.61)   |
| BMI ≥ 30 kg/m <sup>2</sup>      | 2.50 (1.88-3.33)                                             | 2.57 (2.01-3.28)  | 2.67 (2.09-3.4)    | 3.15 (2.43-4.08)   | 2.58 (1.74-3.83)   |
| <b>Arrhythmias</b>              |                                                              |                   |                    |                    |                    |
| BMI 18.5-24.9 kg/m <sup>2</sup> | 1 (Reference)                                                | 1.00 (0.91-1.10)  | 1.04 (0.94-1.15)   | 1.16 (1.03-1.31)   | 1.42 (1.15-1.76)   |
| BMI 25-29.9 kg/m <sup>2</sup>   | 1.02 (0.92-1.14)                                             | 1.11 (1.01-1.22)  | 1.21 (1.10-1.32)   | 1.28 (1.16-1.41)   | 1.31 (1.12-1.54)   |
| BMI ≥ 30 kg/m <sup>2</sup>      | 1.43 (1.26-1.61)                                             | 1.68 (1.53-1.85)  | 1.80 (1.64-1.98)   | 2.03 (1.83-2.25)   | 2.05 (1.76-2.39)   |
| <b>Heart failure</b>            |                                                              |                   |                    |                    |                    |
| BMI 18.5-24.9 kg/m <sup>2</sup> | 1 (Reference)                                                | 1.02 (0.83-1.26)  | 1.28 (1.04-1.57)   | 1.65 (1.30-2.08)   | 2.31 (1.61-3.31)   |
| BMI 25-29.9 kg/m <sup>2</sup>   | 1.25 (1.01-1.56)                                             | 1.27 (1.05-1.54)  | 1.47 (1.22-1.78)   | 1.98 (1.62-2.41)   | 1.95 (1.46-2.59)   |
| BMI ≥ 30 kg/m <sup>2</sup>      | 2.43 (1.94-3.05)                                             | 2.42 (2.00-2.94)  | 3.15 (2.26-3.80)   | 3.69 (3.03-4.48)   | 3.37 (2.57-4.41)   |
| <b>Cerebrovascular diseases</b> |                                                              |                   |                    |                    |                    |
| BMI 18.5-24.9 kg/m <sup>2</sup> | 1 (Reference)                                                | 0.91 (0.79-1.06)  | 1.12 (0.97-1.30)   | 1.45 (1.22-1.72)   | 1.84 (1.39-2.43)   |
| BMI 25-29.9 kg/m <sup>2</sup>   | 1.02 (0.87-1.20)                                             | 1.07 (0.93-1.23)  | 1.17 (1.02-1.35)   | 1.43 (1.24-1.66)   | 1.81 (1.46-2.24)   |
| BMI ≥ 30 kg/m <sup>2</sup>      | 1.21 (1.00-1.46)                                             | 1.49 (1.29-1.72)  | 1.50 (1.30-1.74)   | 1.61 (1.37-1.89)   | 1.36 (1.04-1.77)   |
| <b>Arteriosclerosis</b>         |                                                              |                   |                    |                    |                    |
| BMI 18.5-24.9 kg/m <sup>2</sup> | 1 (Reference)                                                | 1.10 (0.28-4.41)  | 3.71 (1.09-12.60)  | 6.73 (1.94-23.26)  | 18.06 (4.78-68.28) |
| BMI 25-29.9 kg/m <sup>2</sup>   | 0.78 (0.16-3.89)                                             | 2.34 (0.69-7.88)  | 3.81 (1.17-12.42)  | 7.86 (2.42-25.55)  | 2.04 (0.34-12.25)  |
| BMI ≥ 30 kg/m <sup>2</sup>      | 0.61 (0.06-5.85)                                             | 4.42 (1.31-14.96) | 3.76 (1.11-12.72)  | 5.49 (1.60-18.89)  | 10 (2.87-41.15)    |
| <b>Deep vein thrombosis</b>     |                                                              |                   |                    |                    |                    |
| BMI 18.5-24.9 kg/m <sup>2</sup> | 1 (Reference)                                                | 0.85 (0.66-1.09)  | 1.09 (0.85-1.39)   | 1.28 (0.95-1.71)   | 2.10 (1.35-3.27)   |
| BMI 25-29.9 kg/m <sup>2</sup>   | 1.36 (1.06-1.75)                                             | 1.16 (0.93-1.46)  | 1.24 (0.99-1.55)   | 1.24 (0.96-1.59)   | 1.43 (0.96-2.12)   |
| BMI ≥ 30 kg/m <sup>2</sup>      | 1.87 (1.42-2.47)                                             | 1.83 (1.45-2.31)  | 1.83 (1.45-2.31)   | 2.04 (1.58-2.63)   | 2.41 (1.67-3.48)   |
| <b>Asthma</b>                   |                                                              |                   |                    |                    |                    |
| BMI 18.5-24.9 kg/m <sup>2</sup> | 1 (Reference)                                                | 0.99 (0.90-1.08)  | 1.03 (0.94-1.13)   | 1.22 (1.09-1.36)   | 1.58 (1.30-1.92)   |
| BMI 25-29.9 kg/m <sup>2</sup>   | 1.28 (1.16-1.41)                                             | 1.30 (1.19-1.41)  | 1.31 (1.20-1.42)   | 1.36 (1.23-1.50)   | 1.42 (1.21-1.66)   |
| BMI ≥ 30 kg/m <sup>2</sup>      | 1.68 (1.51-1.87)                                             | 1.78 (1.63-1.95)  | 1.84 (1.69-2.01)   | 1.88 (1.70-2.08)   | 1.82 (1.55-2.15)   |
| <b>Liver disease</b>            |                                                              |                   |                    |                    |                    |
| BMI 18.5-24.9 kg/m <sup>2</sup> | 1 (Reference)                                                | 1.12 (0.89-1.41)  | 1.58 (1.26-1.97)   | 2.58 (2.04-3.28)   | 3.19 (2.22-4.58)   |
| BMI 25-29.9 kg/m <sup>2</sup>   | 1.68 (1.33-2.12)                                             | 1.85 (1.50-2.28)  | 2.03 (1.65-2.50)   | 2.67 (2.14-3.32)   | 3.15 (2.34-4.24)   |
| BMI ≥ 30 kg/m <sup>2</sup>      | 3.10 (2.44-3.94)                                             | 3.42 (2.78-4.22)  | 4.02 (3.27-4.94)   | 4.37 (3.51-5.43)   | 4.26 (3.17-5.73)   |
| <b>Renal failure</b>            |                                                              |                   |                    |                    |                    |
| BMI 18.5-24.9 kg/m <sup>2</sup> | 1 (Reference)                                                | 0.97 (0.85-1.11)  | 1.15 (1.00-1.31)   | 1.55 (1.33-1.80)   | 1.89 (1.47-2.45)   |
| BMI 25-29.9 kg/m <sup>2</sup>   | 1.35 (1.17-1.55)                                             | 1.43 (1.27-1.62)  | 1.58 (1.40-1.78)   | 1.87 (1.64-2.13)   | 1.97 (1.63-2.38)   |
| BMI ≥ 30 kg/m <sup>2</sup>      | 2.31 (2.00-2.67)                                             | 2.57 (2.27-2.91)  | 2.89 (2.56-3.26)   | 3.19 (2.80-3.63)   | 2.97 (2.47-3.58)   |
| <b>Gout</b>                     |                                                              |                   |                    |                    |                    |
| BMI 18.5-24.9 kg/m <sup>2</sup> | 1 (Reference)                                                | 1.60 (0.92-2.77)  | 2.04 (1.19-3.52)   | 2.51 (1.39-4.53)   | 5.31 (2.58-10.93)  |
| BMI 25-29.9 kg/m <sup>2</sup>   | 2.99 (1.75-5.09)                                             | 4.05 (2.47-6.65)  | 5.09 (3.12-8.31)   | 6.72 (4.09-11.04)  | 8.91 (5.16-15.40)  |
| BMI ≥ 30 kg/m <sup>2</sup>      | 7.73 (4.53-13.19)                                            | 8.88 (5.42-14.57) | 11.29 (6.93-18.39) | 14.34 (8.76-23.47) | 15.67 (9.19-26.73) |
| <b>Osteoarthritis</b>           |                                                              |                   |                    |                    |                    |
| BMI 18.5-24.9 kg/m <sup>2</sup> | 1 (Reference)                                                | 1.11 (1.03-1.20)  | 1.15 (1.06-1.24)   | 1.23 (1.12-1.35)   | 1.03 (0.84-1.26)   |
| BMI 25-29.9 kg/m <sup>2</sup>   | 1.59 (1.47-1.72)                                             | 1.72 (1.61-1.85)  | 1.79 (1.67-1.92)   | 1.84 (1.71-1.99)   | 1.87 (1.65-2.11)   |
| BMI ≥ 30 kg/m <sup>2</sup>      | 2.87 (2.65-3.11)                                             | 2.96 (2.76-3.17)  | 3.12 (2.91-3.35)   | 3.21 (2.97-3.46)   | 3.24 (2.89-3.63)   |
| <b>Sleep disorders</b>          |                                                              |                   |                    |                    |                    |
| BMI 18.5-24.9 kg/m <sup>2</sup> | 1 (Reference)                                                | 0.96 (0.70-1.32)  | 1.06 (0.77-1.45)   | 1.28 (0.88-1.84)   | 1.64 (0.90-2.98)   |
| BMI 25-29.9 kg/m <sup>2</sup>   | 1.76 (1.29-2.39)                                             | 1.81 (1.37-2.39)  | 2.10 (1.60-2.76)   | 2.37 (1.77-3.17)   | 2.34 (1.56-3.53)   |
| BMI ≥ 30 kg/m <sup>2</sup>      | 5.96 (4.47-7.94)                                             | 6.13 (4.70-8.00)  | 7.21 (5.55-9.37)   | 8.41 (6.43-11.00)  | 8.92 (6.50-12.24)  |
| <b>Mood disorders</b>           |                                                              |                   |                    |                    |                    |
| BMI 18.5-24.9 kg/m <sup>2</sup> | 1 (Reference)                                                | 1.19 (1.06-1.34)  | 1.39 (1.24-1.56)   | 1.94 (1.70-2.21)   | 2.23 (1.78-2.79)   |
| BMI 25-29.9 kg/m <sup>2</sup>   | 1.38 (1.21-1.57)                                             | 1.49 (1.33-1.67)  | 1.71 (1.53-1.91)   | 1.98 (1.75-2.23)   | 2.23 (1.85-2.68)   |
| BMI ≥ 30 kg/m <sup>2</sup>      | 1.98 (1.73-2.28)                                             | 2.41 (2.14-2.70)  | 2.52 (2.25-2.83)   | 2.83 (2.50-3.21)   | 3.21 (2.68-3.85)   |

<sup>a</sup> HR adjusted for age, sex, and Townsend deprivation index. Healthy lifestyle score included 4 lifestyle factors (never smoking, no or moderate alcohol consumption, physical activity, healthy diet). Participants scored 1 if they met the criterion for a healthy lifestyle and 0 otherwise

**eTable 10.** Hazard ratios for Incident Diseases by Lifestyle Profile in Each Body Mass Index Category After Exclusion of Participants With Diseases Diagnosed Within the First 2 Years of Follow-up

| Healthy lifestyle factor |                                    |               |              | HR (95% CI)                    |                             |                           |                        |
|--------------------------|------------------------------------|---------------|--------------|--------------------------------|-----------------------------|---------------------------|------------------------|
| Physically active        | No or moderate alcohol consumption | Never smoking | Healthy diet | Total population (n = 438 583) | BMI 18.5-24.9 (n = 144 579) | BMI 25-29.9 (n = 186 963) | BMI ≥ 30 (n = 107 041) |
| No                       | No                                 | No            | No           | Reference                      | Reference                   | Reference                 | Reference              |
| No                       | No                                 | No            | Yes          | 0.71 (0.68-0.75)               | 0.61 (0.55-0.68)            | 0.71 (0.66-0.77)          | 0.82 (0.76-0.89)       |
| No                       | No                                 | Yes           | No           | 0.92 (0.88-0.96)               | 0.91 (0.83-1.00)            | 0.92 (0.86-0.98)          | 1.01 (0.94-1.08)       |
| No                       | No                                 | Yes           | Yes          | 0.70 (0.67-0.74)               | 0.66 (0.60-0.72)            | 0.75 (0.70-0.80)          | 0.80 (0.74-0.86)       |
| No                       | Yes                                | No            | No           | 1.13 (1.09-1.18)               | 1.04 (0.95-1.15)            | 1.11 (1.04-1.19)          | 1.16 (1.09-1.23)       |
| No                       | Yes                                | No            | Yes          | 0.77 (0.74-0.80)               | 0.63 (0.58-0.70)            | 0.76 (0.71-0.81)          | 0.88 (0.83-0.94)       |
| No                       | Yes                                | Yes           | No           | 1.08 (1.04-1.13)               | 0.92 (0.84-1.01)            | 1.08 (1.01-1.15)          | 1.18 (1.11-1.25)       |
| No                       | Yes                                | Yes           | Yes          | 0.82 (0.79-0.85)               | 0.70 (0.65-0.76)            | 0.83 (0.78-0.88)          | 0.96 (0.9-1.02)        |
| Yes                      | No                                 | No            | No           | 0.86 (0.83-0.89)               | 0.84 (0.77-0.92)            | 0.91 (0.86-0.96)          | 0.92 (0.86-0.98)       |
| Yes                      | No                                 | No            | Yes          | 0.62 (0.60-0.65)               | 0.58 (0.53-0.63)            | 0.67 (0.62-0.71)          | 0.75 (0.69-0.80)       |
| Yes                      | No                                 | Yes           | No           | 0.78 (0.76-0.81)               | 0.74 (0.68-0.79)            | 0.88 (0.84-0.93)          | 0.92 (0.87-0.98)       |
| Yes                      | No                                 | Yes           | Yes          | 0.61 (0.59-0.63)               | 0.61 (0.56-0.66)            | 0.69 (0.66-0.73)          | 0.72 (0.68-0.77)       |
| Yes                      | Yes                                | No            | No           | 0.97 (0.93-1.00)               | 0.90 (0.82-0.98)            | 1.00 (0.95-1.06)          | 1.02 (0.96-1.09)       |
| Yes                      | Yes                                | No            | Yes          | 0.67 (0.64-0.69)               | 0.61 (0.56-0.66)            | 0.71 (0.67-0.75)          | 0.80 (0.75-0.85)       |
| Yes                      | Yes                                | Yes           | No           | 0.89 (0.86-0.93)               | 0.82 (0.76-0.89)            | 0.94 (0.89-0.99)          | 1.04 (0.99-1.11)       |
| Yes                      | Yes                                | Yes           | Yes          | 0.69 (0.67-0.71)               | 0.65 (0.6-0.69)             | 0.77 (0.73-0.81)          | 0.85 (0.80-0.90)       |

HR, hazard ratio; CI, confidence interval

**eTable 11.** Adjusted Hazard Ratios for Incident Diseases by Lifestyle Profile in Each Body Mass Index Category After Exclusion of Participants With Diseases Diagnosed Within the First 2 Years of Follow-up

| Healthy lifestyle factor |                                    |               |              | HR (95% CI) <sup>a</sup>       |                             |                           |                        |
|--------------------------|------------------------------------|---------------|--------------|--------------------------------|-----------------------------|---------------------------|------------------------|
| Physically active        | No or moderate alcohol consumption | Never smoking | Healthy diet | Total population (n = 438 583) | BMI 18.5-24.9 (n = 144 579) | BMI 25-29.9 (n = 186 963) | BMI ≥ 30 (n = 107 041) |
| No                       | No                                 | No            | No           | Reference                      | Reference                   | Reference                 | Reference              |
| No                       | No                                 | No            | Yes          | 0.84 (0.80-0.88)               | 0.70 (0.63-0.79)            | 0.81 (0.75-0.88)          | 0.93 (0.86-1.01)       |
| No                       | No                                 | Yes           | No           | 0.92 (0.89-0.96)               | 0.89 (0.81-0.98)            | 0.88 (0.82-0.94)          | 0.98 (0.92-1.05)       |
| No                       | No                                 | Yes           | Yes          | 0.79 (0.76-0.83)               | 0.69 (0.63-0.77)            | 0.78 (0.72-0.83)          | 0.86 (0.80-0.93)       |
| No                       | Yes                                | No            | No           | 1.07 (1.03-1.11)               | 1.02 (0.93-1.12)            | 1.07 (1.01-1.14)          | 1.11 (1.04-1.18)       |
| No                       | Yes                                | No            | Yes          | 0.85 (0.82-0.89)               | 0.71 (0.65-0.78)            | 0.84 (0.79-0.90)          | 0.95 (0.89-1.01)       |
| No                       | Yes                                | Yes           | No           | 0.99 (0.95-1.03)               | 0.87 (0.79-0.95)            | 0.99 (0.93-1.06)          | 1.07 (1.00-1.13)       |
| No                       | Yes                                | Yes           | Yes          | 0.86 (0.83-0.89)               | 0.72 (0.66-0.78)            | 0.84 (0.80-0.89)          | 0.96 (0.91-1.02)       |
| Yes                      | No                                 | No            | No           | 0.88 (0.85-0.92)               | 0.81 (0.75-0.89)            | 0.87 (0.82-0.92)          | 0.92 (0.86-0.98)       |
| Yes                      | No                                 | No            | Yes          | 0.74 (0.71-0.77)               | 0.64 (0.58-0.70)            | 0.73 (0.68-0.78)          | 0.84 (0.78-0.90)       |
| Yes                      | No                                 | Yes           | No           | 0.82 (0.79-0.85)               | 0.70 (0.65-0.76)            | 0.83 (0.78-0.87)          | 0.90 (0.84-0.95)       |
| Yes                      | No                                 | Yes           | Yes          | 0.70 (0.68-0.73)               | 0.62 (0.57-0.67)            | 0.70 (0.66-0.74)          | 0.78 (0.73-0.83)       |
| Yes                      | Yes                                | No            | No           | 0.94 (0.90-0.97)               | 0.84 (0.77-0.92)            | 0.94 (0.89-1.00)          | 0.98 (0.92-1.04)       |
| Yes                      | Yes                                | No            | Yes          | 0.77 (0.74-0.80)               | 0.65 (0.60-0.70)            | 0.76 (0.72-0.81)          | 0.87 (0.82-0.93)       |
| Yes                      | Yes                                | Yes           | No           | 0.86 (0.83-0.90)               | 0.76 (0.70-0.82)            | 0.85 (0.80-0.89)          | 0.96 (0.91-1.02)       |
| Yes                      | Yes                                | Yes           | Yes          | 0.75 (0.73-0.78)               | 0.64 (0.59-0.69)            | 0.76 (0.72-0.80)          | 0.86 (0.82-0.91)       |

HR, hazard ratio; CI, confidence interval  
<sup>a</sup> HR adjusted for age, sex, BMI, and Townsend deprivation index

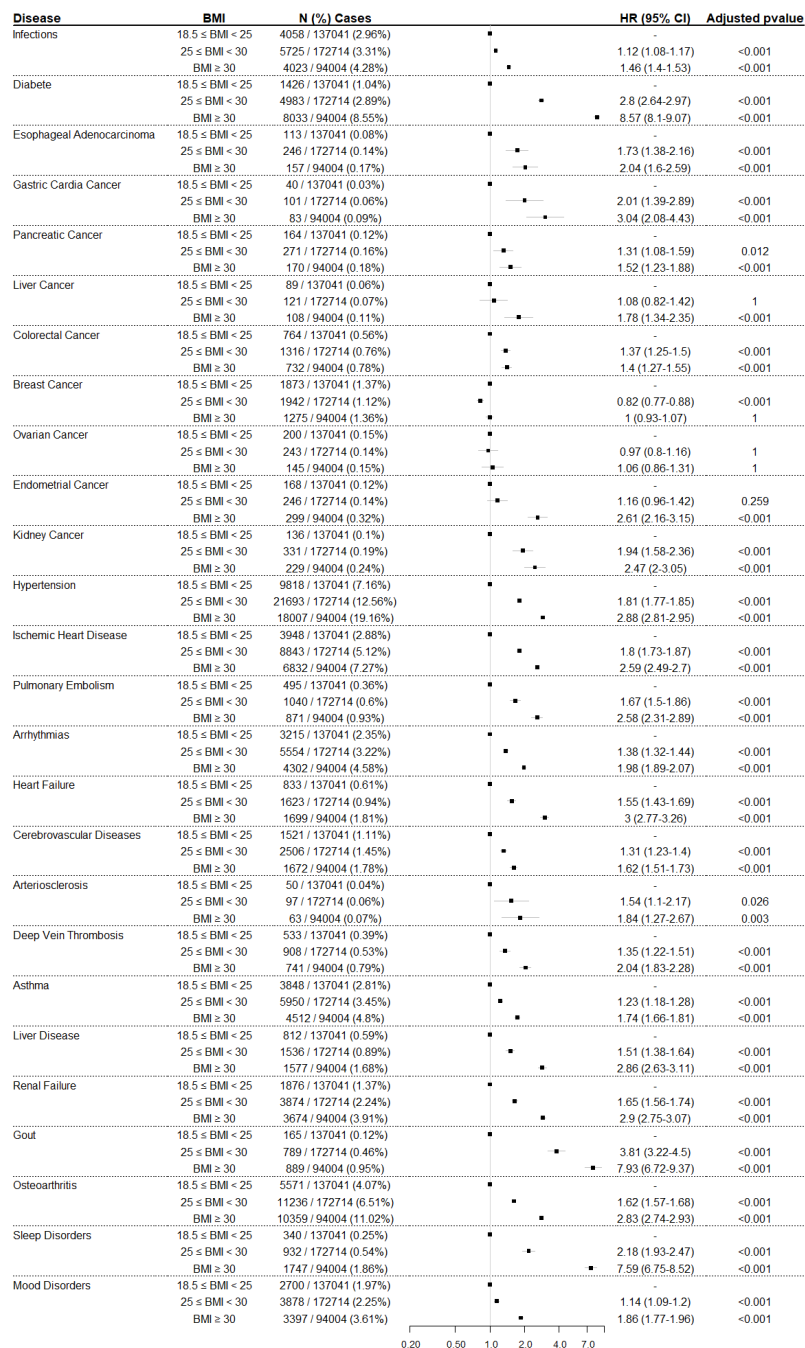

**eFigure 7. Hazard Ratios for Incident Diseases by Body Mass Index Category After Exclusion of Participants With Diseases Diagnosed Within the First 2 Years of Follow-up**

BMI, body mass index; HR, hazard ratio; CI, confidence interval

Hazard ratios (95% CI) for obesity (BMI ≥30.0 kg/m<sup>2</sup>) and overweight (25-29.9 kg/m<sup>2</sup>) versus healthy weight (18.5–24.9 kg/m<sup>2</sup>) were calculated in Cox proportional hazards models. All the p-values are presented after Bonferroni multiple testing adjustments.

Healthy lifestyle score included 4 lifestyle factors (never smoking, no or moderate alcohol consumption, physical activity, healthy diet). Individuals scored 1 if they met the criterion for a healthy lifestyle and 0 otherwise



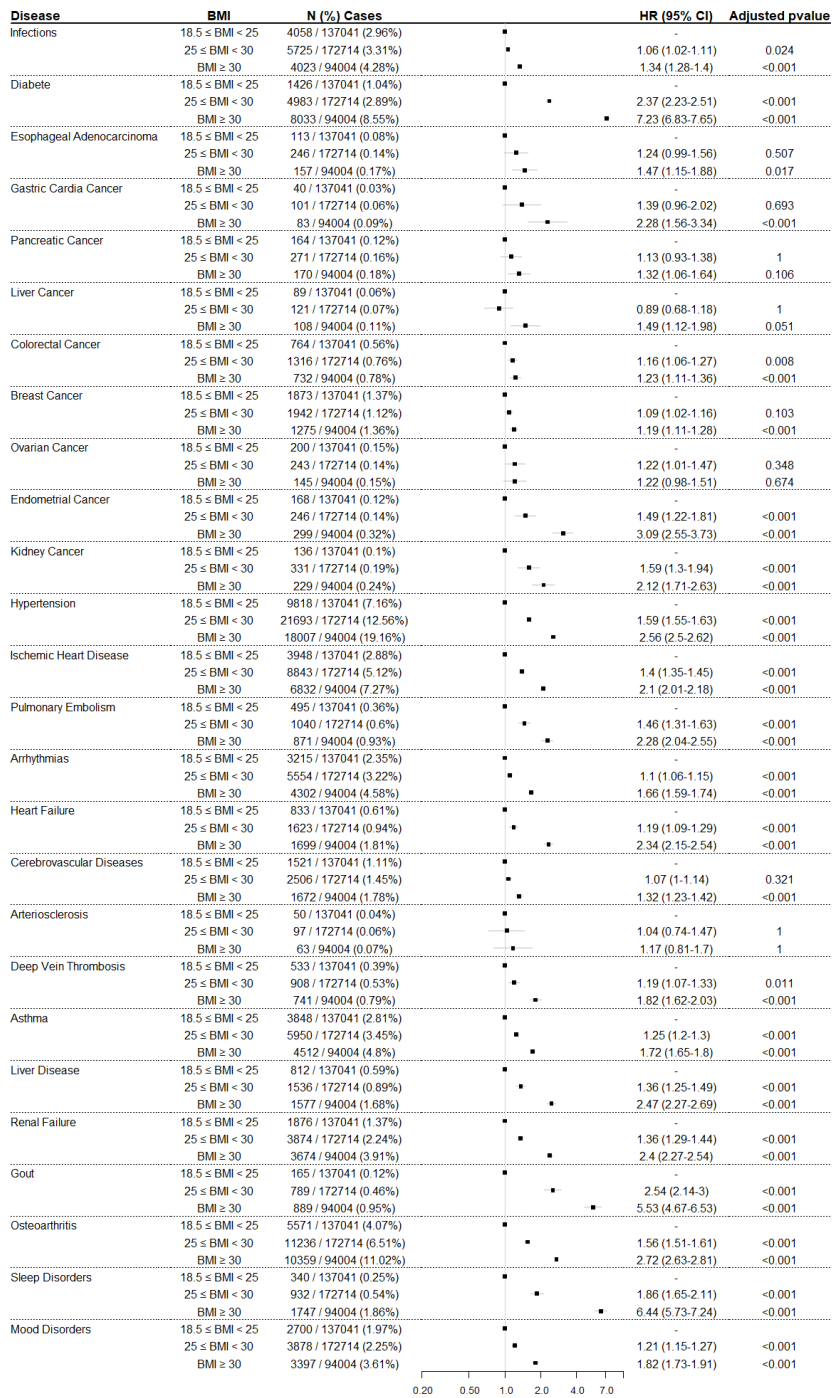

**eFigure 8. Adjusted Hazard Ratios for Incident Diseases by Body Mass Index Category After Exclusion of Participants With Diseases Diagnosed Within the First 2 Years of Follow-up**

BMI, body mass index; HR, hazard ratio; CI, confidence interval  
Hazard ratios (95% CI) for obesity (BMI ≥30.0 kg/m<sup>2</sup>) and overweight (25-29.9 kg/m<sup>2</sup>) versus healthy weight (18.5–24.9 kg/m<sup>2</sup>) were calculated in Cox proportional hazards models after adjustment of age, sex, Townsend deprivation index, and healthy lifestyle score. All the p-values are presented after Bonferroni multiple testing adjustments. Healthy lifestyle score included 4 lifestyle factors (never smoking, no or moderate alcohol consumption, physical activity, healthy diet). Individuals scored 1 if they met the criterion for a healthy lifestyle and 0 otherwise

A.

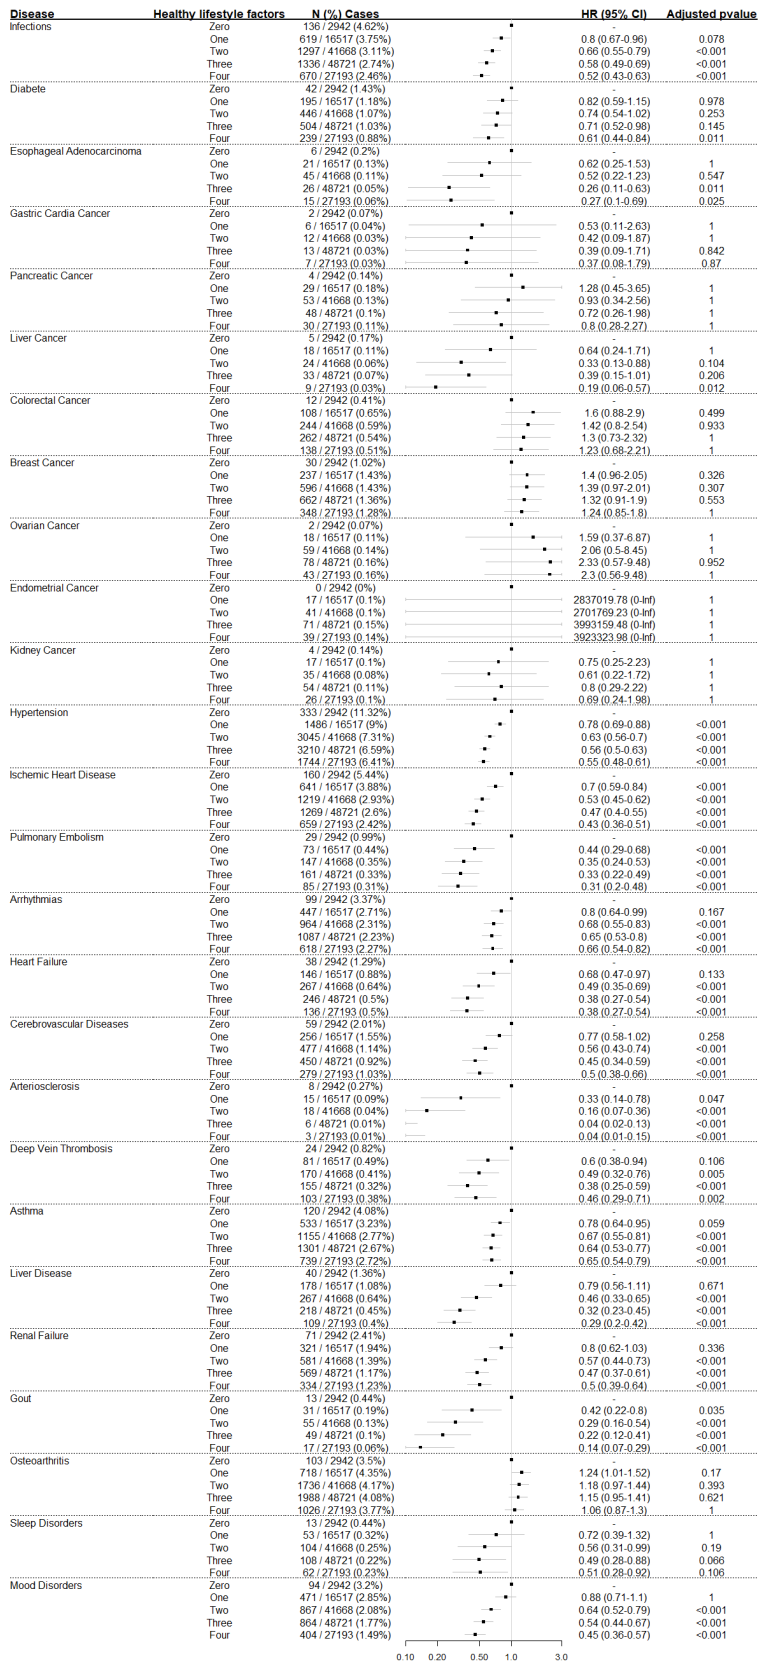

B.

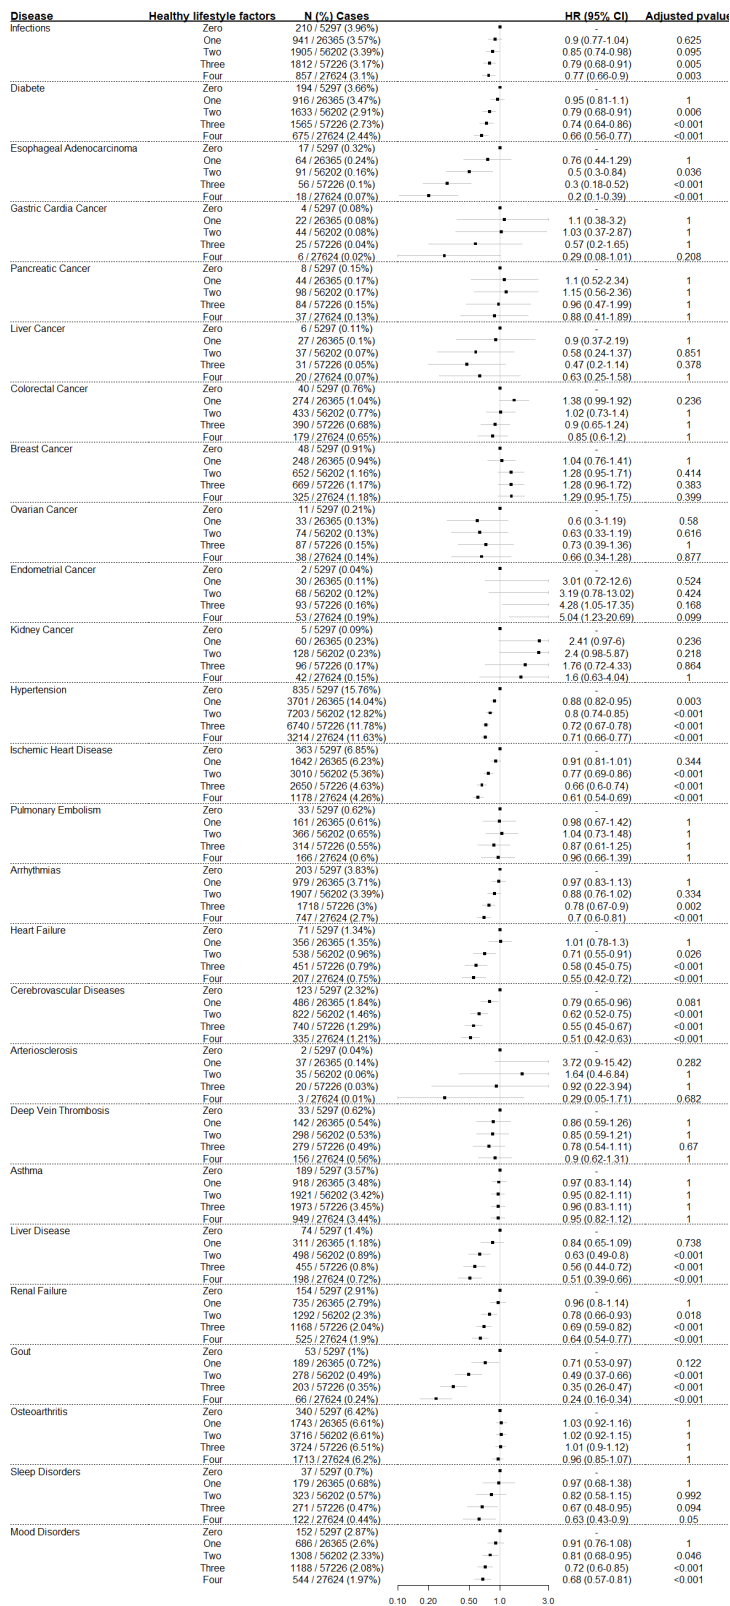

C.

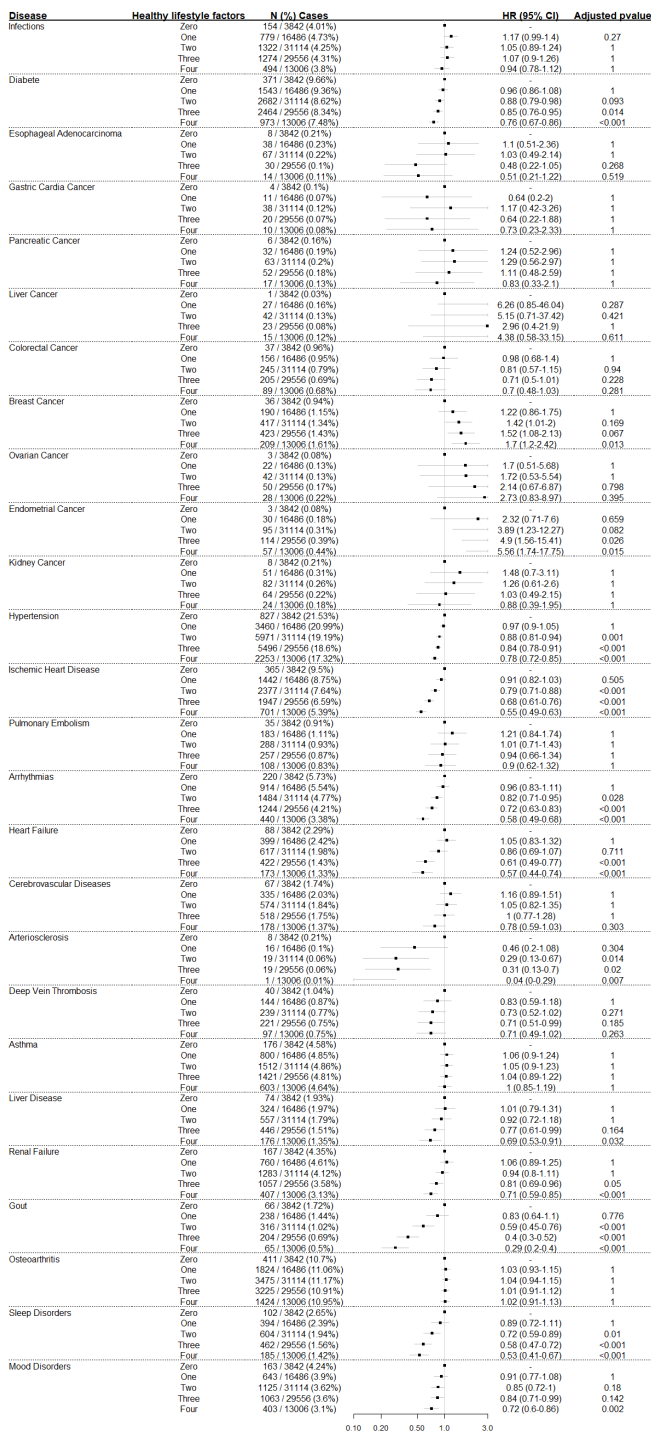

**eFigure 9. Hazard Ratios for Incident Diseases by Lifestyle Profile in Individuals With Normal Weight (BMI 18.5-24.9) (A), Overweight (BMI 25-29.9) (B), and Obesity (BMI ≥30) (C) After Exclusion of Participants With Diseases Diagnosed Within the First 2 years of Follow-up**

BMI, body mass index; HR, hazard ratio; CI, confidence interval

Hazard ratios (95% CI) for a lifestyle score equal to 1, 2, 3 or 4 versus a lifestyle score equal to zero were calculated in Cox proportional hazards models. All the p-values are presented after Bonferroni multiple testing adjustments.

For each lifestyle factor, individuals scored 1 if they met the criterion for a healthy lifestyle (never smoking, no or moderate alcohol consumption, physical activity, or healthy diet) and 0 otherwise. The healthy lifestyle score was computed by summing the four scores. It ranged between zero (lowest healthy score) and 4 (highest healthy score).

A.

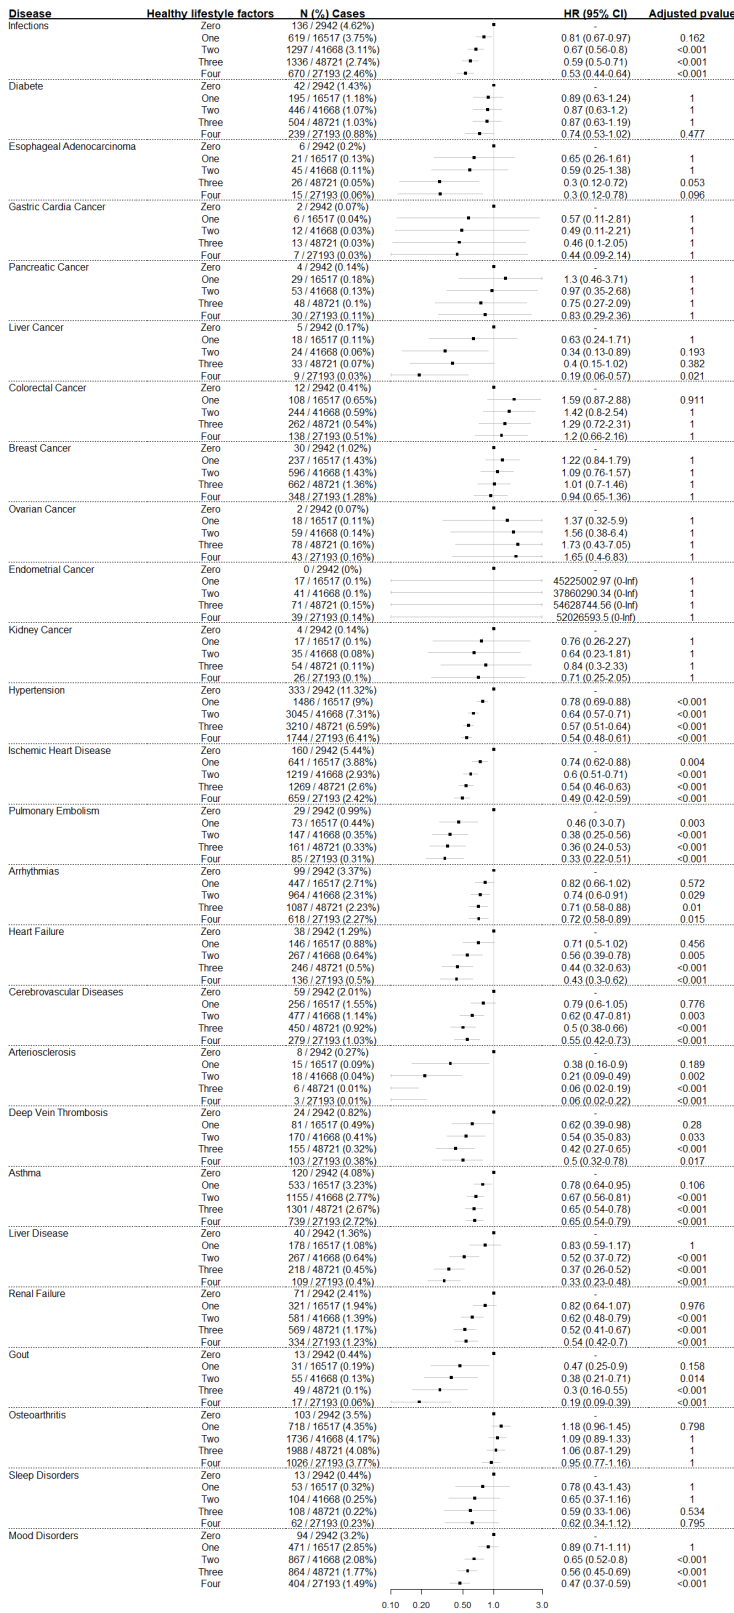

0.10 0.20 0.50 1.0 3.0

B.

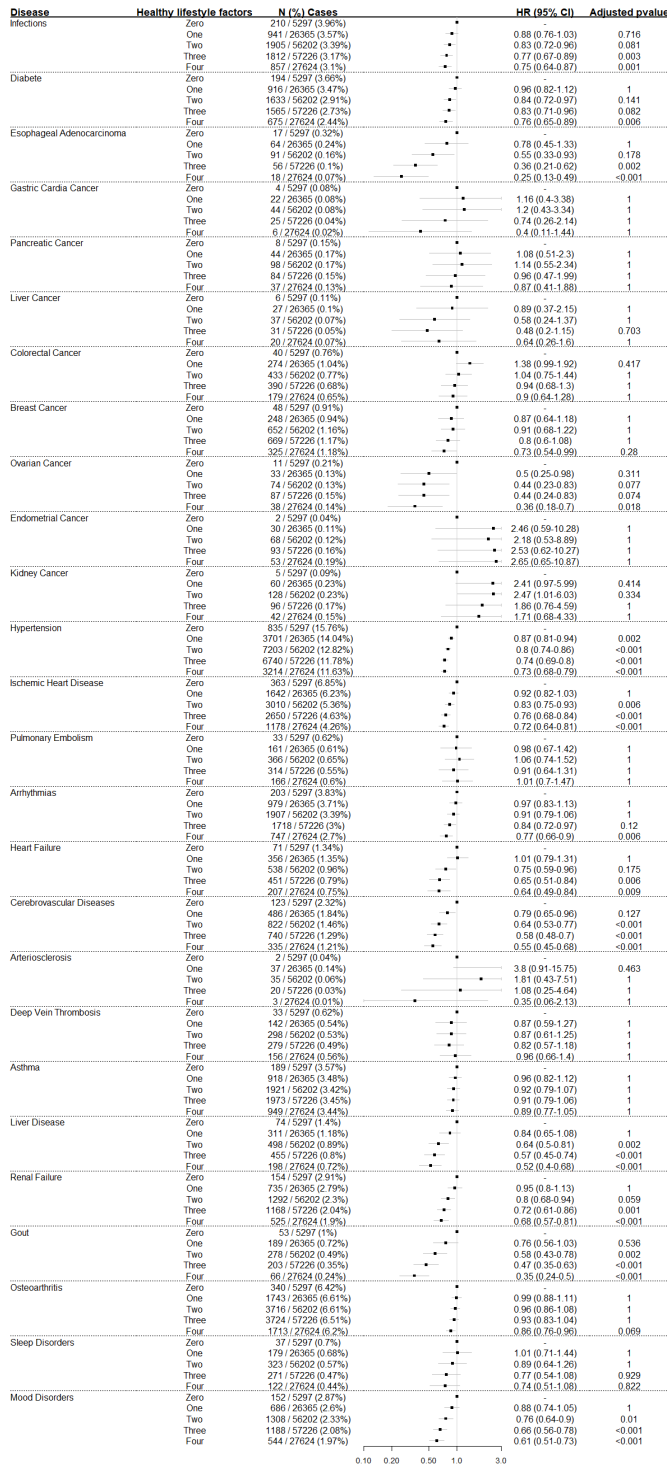

C.

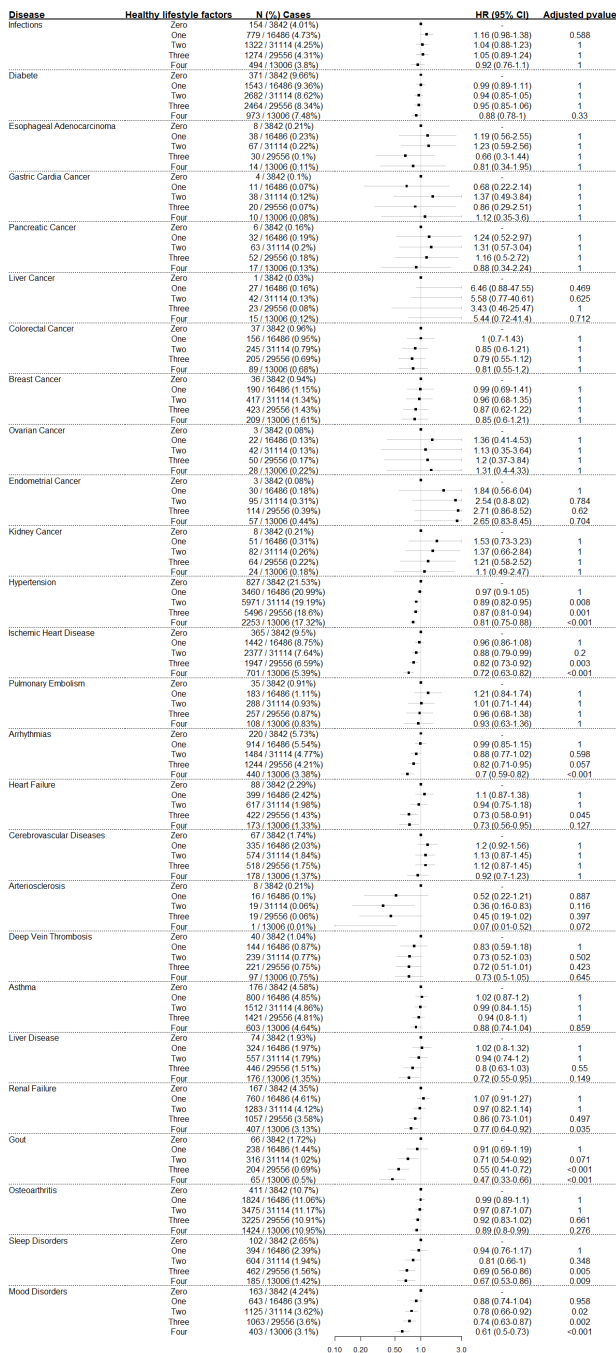

**eFigure 10. Adjusted Hazard Ratios for Incident Diseases by Lifestyle Profile in Individuals With Normal Weight (BMI 18.5-24.9) (A), Overweight (BMI 25-29.9) (B), and Obesity (BMI ≥30) (C) After Exclusion of Participants With Diseases Diagnosed Within the First 2 Years of Follow-up**

BMI, body mass index; HR, hazard ratio; CI, confidence interval

Hazard ratios (95% CI) for a lifestyle score equal to 1, 2, 3 or 4 versus a lifestyle score equal to zero were calculated in Cox proportional hazards models. All the p-values are presented after Bonferroni multiple testing adjustments.

For each lifestyle factor, individuals scored 1 if they met the criterion for a healthy lifestyle (never smoking, no or moderate alcohol consumption, physical activity, or healthy diet) and 0 otherwise. The healthy lifestyle score was computed by summing the four scores. It ranged between zero (lowest healthy score) and 4 (highest healthy score).

**eFigure 11.** Association of Healthy Lifestyle Score With Incident Diseases in Adults With a Healthy Weight

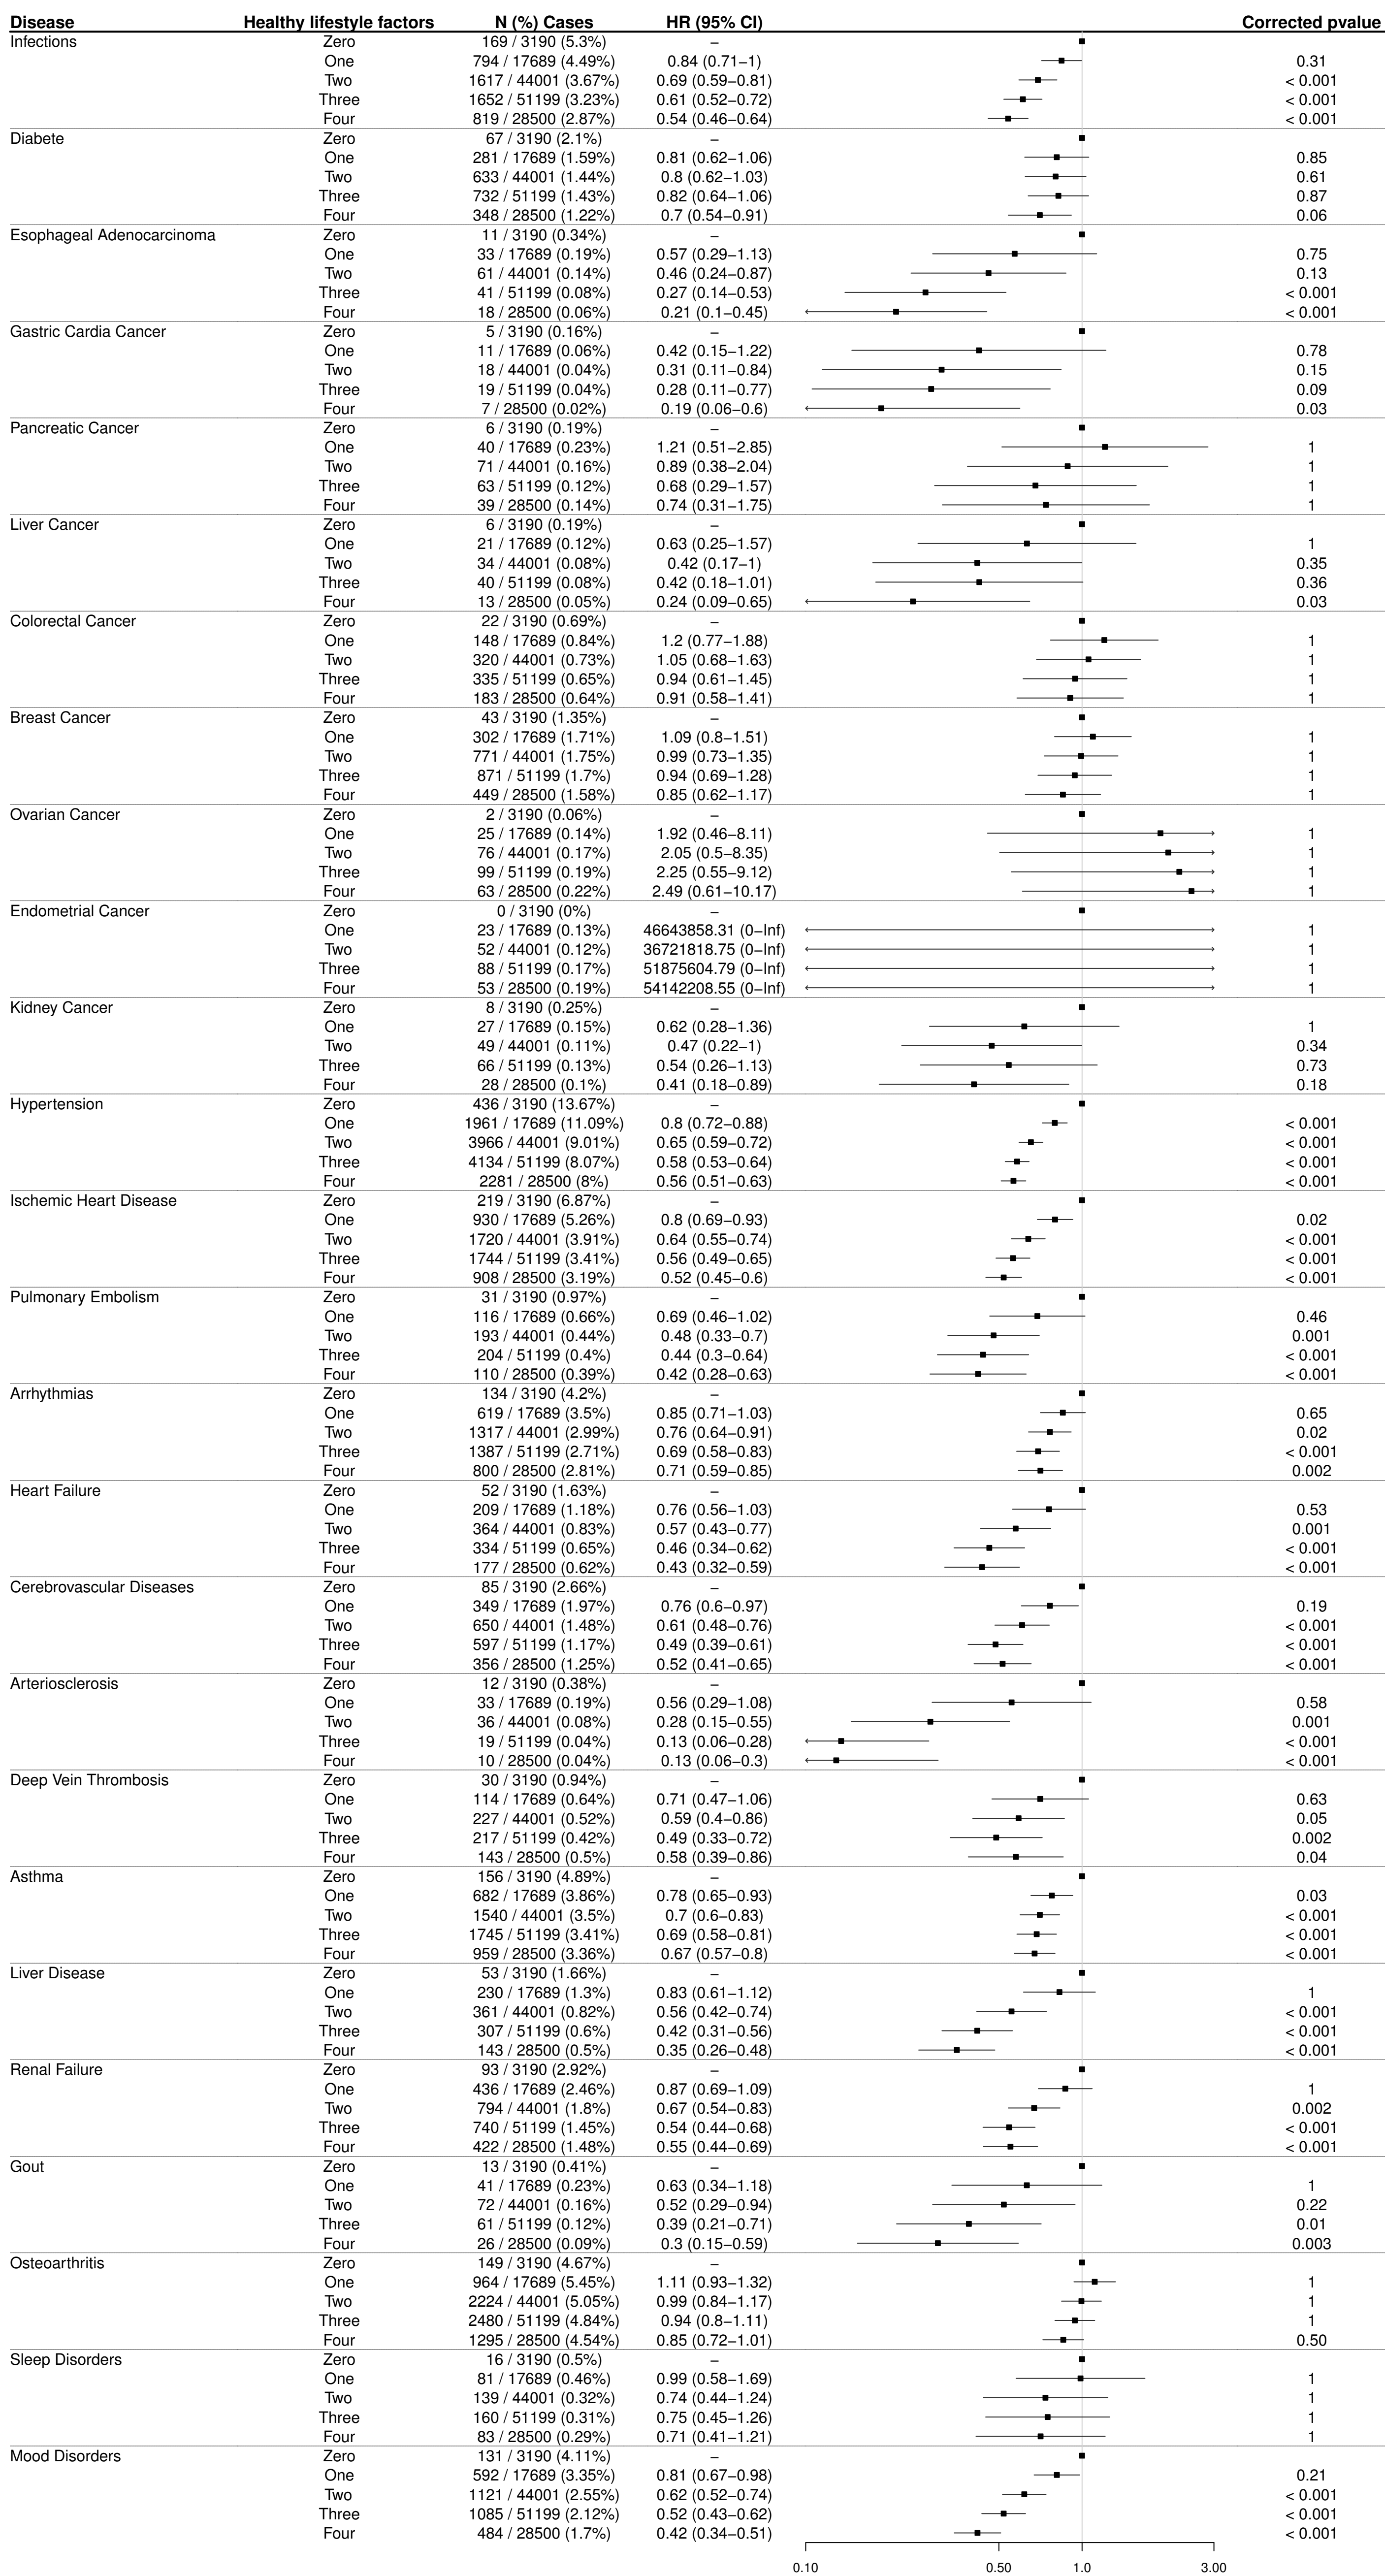



**eFigure 12.** Association of Healthy Lifestyle Score With Incident Diseases in Adults With Obesity

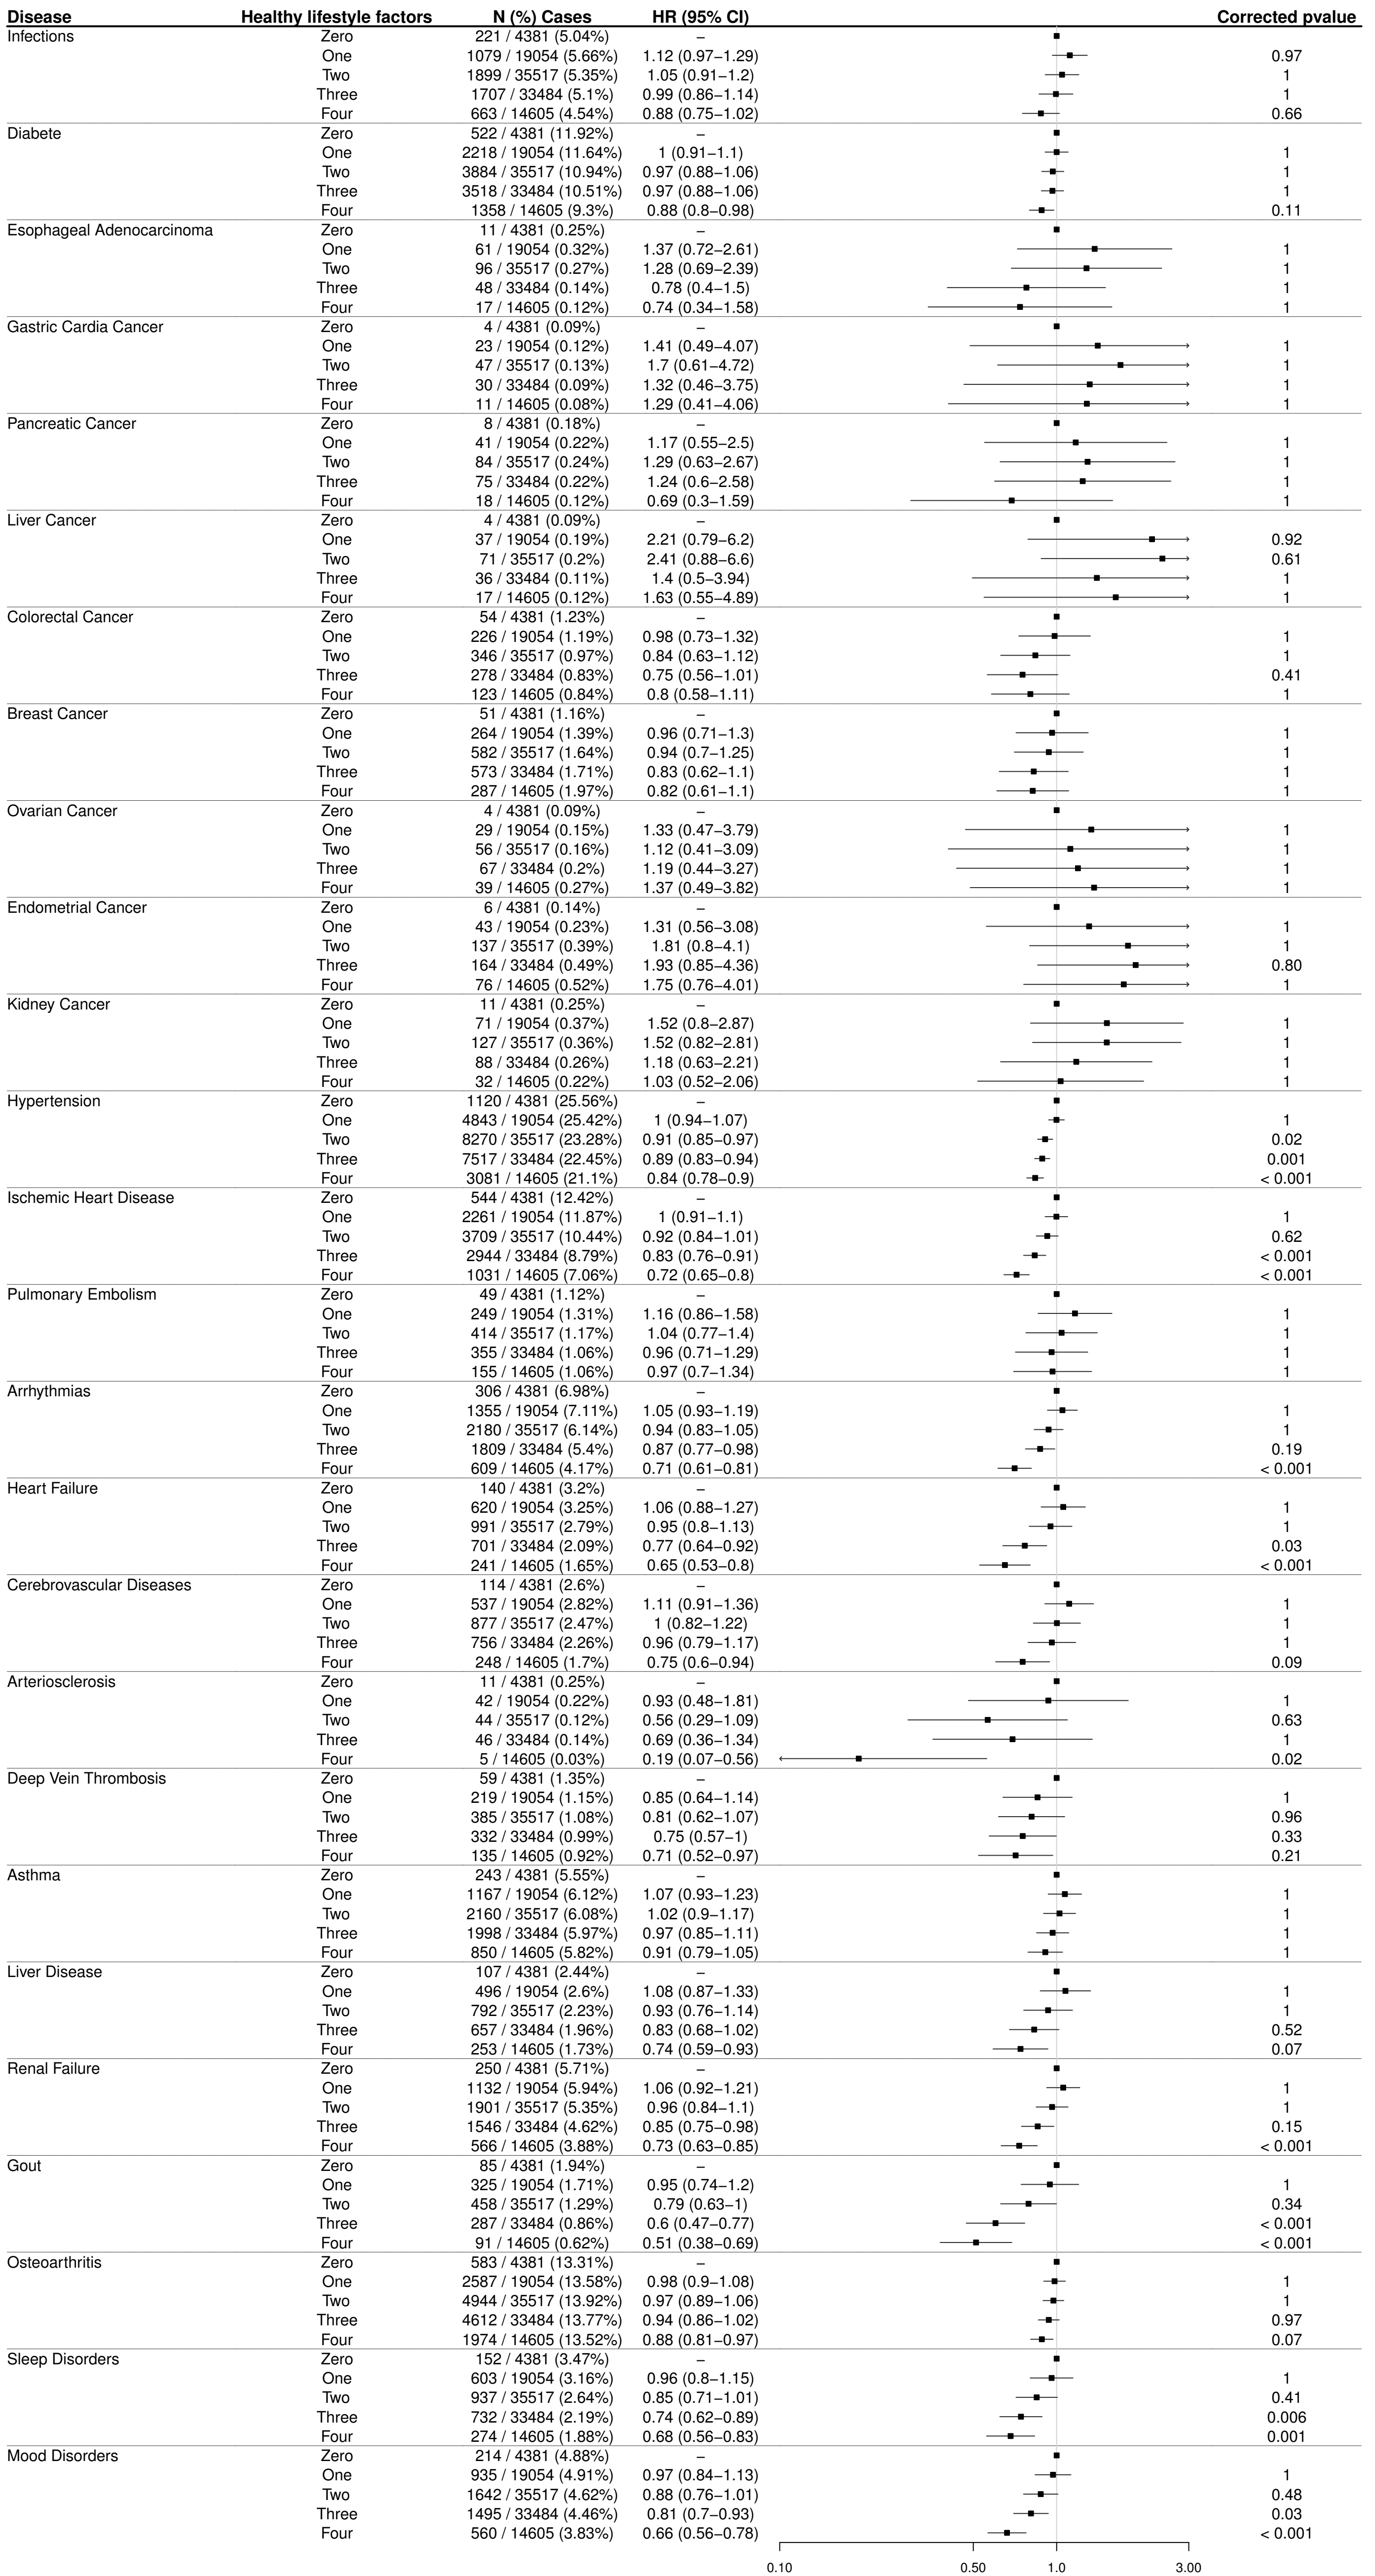

Supplement: jamanetwopen-e2314741-s001.pdf [file jamanetwopen-e2314741-s001.pdf]
