# Supplementary material for: Association of Healthy Lifestyle Factors and Obesity-Related Diseases in Adults in the UK
Source: PubMed Central journal article supplement (PMC10220514; doi:10.1001/jamanetworkopen.2023.14741), 2023-05-26
Supplement: jamanetwopen-e2314741-s002.pdf [file jamanetwopen-e2314741-s002.pdf]

## Data Sharing Statement

Rassy. Association of Healthy Lifestyle Factors and Obesity-Related Diseases in Adults in the UK. *JAMA Netw Open*. Published May 26, 2023. doi:10.1001/jamanetworkopen.2023.14741

### Data

**Data available:** Yes

**Data types:** Deidentified participant data, Other (please specify)

**Additional Information:** Data from UK Biobank

**How to access data:** Data from UK Biobank are available on application at [www.ukbiobank.ac.uk/register-apply](http://www.ukbiobank.ac.uk/register-apply)

**When available:** With publication

### Supporting Documents

**Document types:** None

### Additional Information

**Who can access the data:** anyone requesting the data

**Types of analyses:** for any purpose or for a specified purpose

**Mechanisms of data availability:** NA
